# Supplementary material for: Cost of oropharyngeal dysphagia after stroke: protocol for a systematic review
Source: PubMed Central journal article supplement — BMJ Open. 2018 Dec 14;8(12):e022775. doi: 10.1136/bmjopen-2018-022775 (PMC6303570; doi:10.1136/bmjopen-2018-022775), 2018-12-14
Supplement: bmjopen-2018-022775.draft_revisions.pdf [file bmjopen-2018-022775.draft_revisions.pdf]

# BMJ Open

BMJ Open is committed to open peer review. As part of this commitment we make the peer review history of every article we publish publicly available.

When an article is published we post the peer reviewers' comments and the authors' responses online. We also post the versions of the paper that were used during peer review. These are the versions that the peer review comments apply to.

The versions of the paper that follow are the versions that were submitted during the peer review process. They are not the versions of record or the final published versions. They should not be cited or distributed as the published version of this manuscript.

BMJ Open is an open access journal and the full, final, typeset and author-corrected version of record of the manuscript is available on our site with no access controls, subscription charges or pay-per-view fees (<http://bmjopen.bmj.com>).

If you have any questions on BMJ Open's open peer review process please email [info.bmjopen@bmj.com](mailto:info.bmjopen@bmj.com)

# BMJ Open

## Cost of Oropharyngeal Dysphagia after Stroke: protocol for a systematic review.

|                               |                                                                                                                                                                                                                                                                                                                 |
|-------------------------------|-----------------------------------------------------------------------------------------------------------------------------------------------------------------------------------------------------------------------------------------------------------------------------------------------------------------|
| Journal:                      | <i>BMJ Open</i>                                                                                                                                                                                                                                                                                                 |
| Manuscript ID                 | bmjopen-2018-022775                                                                                                                                                                                                                                                                                             |
| Article Type:                 | Protocol                                                                                                                                                                                                                                                                                                        |
| Date Submitted by the Author: | 20-Mar-2018                                                                                                                                                                                                                                                                                                     |
| Complete List of Authors:     | Marin, Sergio; Consorci Sanitari del Maresme, Pharmacy Department Serra-Prat, Mateu; Consorci Sanitari del Maresme, Unitat de Recerca Ortega, Omar; Consorci Sanitari del Maresme, Gastrointestinal Physiology Laboratory<br>Clave, Pere; Consorci Sanitari del Maresme, Gastrointestinal Physiology Laboratory |
| Keywords:                     | Oropharyngeal Dysphagia, Pneumonia, aspiration, Malnutrition, Stroke < NEUROLOGY, Economics < TROPICAL MEDICINE, Health Resources                                                                                                                                                                               |
|                               |                                                                                                                                                                                                                                                                                                                 |

SCHOLARONE™  
Manuscripts

Peer Review Only

1  
2  
3  
4 TITLE5  
6 Cost of Oropharyngeal Dysphagia after Stroke: protocol for a systematic review.  
78  
9 AUTHORS10  
11 1. Marin Rubio, Sergio (Corresponding Author). Consorci Sanitari del Maresme, Pharmacy,  
12 Mataro, Catalunya, ES. Postal address: Consorci Sanitari del Maresme, Carretera de Cirera,  
13 w/n. Mataro, Barcelona, ES 08304.  
14  
1516  
17 Email: smarin@csgm.cat  
1819  
20 Tel. 93 741 77 00. Fax. 93 741 77 53.  
21  
2223  
24 2. Serra Prat, Mateu. Consorci Sanitari del Maresme, Research Unit, Mataro, Catalunya, ES.  
25  
26 Centro de Investigación Biomédica en Red de enfermedades hepáticas y digestivas  
27 (CIBERehd), Instituto de Salud Carlos III, Barcelona Catalunya, ES.  
28  
2930  
31 3. Ortega Fernandez, Omar. Consorci Sanitari del Maresme, Gastrointestinal Physiology  
32 Laboratory, Universitat Autònoma de Barcelona, Mataro, Catalunya, ES. Centro de  
33 Investigación Biomédica en Red de enfermedades hepáticas y digestivas (CIBERehd),  
34 Instituto de Salud Carlos III, Barcelona Catalunya, ES.  
35  
3637  
38 4. Clavé Civit, Pere. Consorci Sanitari del Maresme, Gastrointestinal Physiology Laboratory,  
39 Universitat Autònoma de Barcelona, Mataro, Catalunya, ES. Centro de Investigación  
40 Biomédica en Red de enfermedades hepáticas y digestivas (CIBERehd), Instituto de Salud  
41 Carlos III, Barcelona Catalunya, ES.  
42  
4344  
45 WORD COUNT46  
47 3553.  
48  
49  
50

## ABSTRACT

### **Introduction:**

Oropharyngeal Dysphagia (OD) is a major disorder following stroke. OD can produce alterations in both the efficacy and safety of deglutition and may result in malnutrition, dehydration, frailty, respiratory infections and pneumonia. These complications can be avoided by early detection and treatment of OD in post-stroke patients and hospital stays, drug consumption and mortality rates can be reduced. Apart from acute in-hospital costs due to OD complications, there are also other costs related to post-stroke OD, such as direct non-healthcare costs or indirect costs. However, costs associated with acute and chronic OD in stroke patients have been poorly studied and are not well known. The objective of this systematic review is to assess and summarize literature on the additional attributable cost of OD in post-stroke patients.

### **Methods and analysis:**

A systematic review of studies on the cost of OD and its complications (aspiration, malnutrition, dehydration, aspiration pneumonia and death) in stroke patients will be performed from the hospital, the health care system and social perspectives. The main outcome of interest is the additional costs attributable to post-stroke OD. We will search MEDLINE, EMBASE and the National Health Service Economic Evaluation Database (NHS EED). Studies will be included if they are partial economic evaluation studies, studies that provide information on costs in adult (>18 years) post stroke patients with OD and/or its complications (malnutrition, dehydration, frailty, respiratory infections and pneumonia) or economic evaluation studies in which the cost of the disease has been estimated. Studies

1  
2  
3  
4 will be excluded if they refer to oesophageal dysphagia or OD caused by causes other than  
5  
6 stroke. Main study information will be presented and summarized in tables, separately for  
7  
8 controlled and not-controlled studies, and according to the perspective in which costs were  
9  
10 measured.  
11

#### 12 13 **Ethics and dissemination:**

14  
15  
16 The results of this systematic review will be published in a peer-reviewed journal.  
17  
18  
19  
20  
21

#### 22 **KEYWORDS**

23  
24 Oropharyngeal Dysphagia

25  
26  
27 Pneumonia, aspiration

28  
29  
30 Malnutrition

31  
32  
33 Stroke

34  
35  
36 Economics

37  
38  
39 Health Resources  
40  
41  
42  
43

#### 44 **STRENGTHS AND LIMITATIONS OF THIS STUDY**

45  
46 This systematic review will help us understand the state of the art of health-economic  
47  
48 analysis regarding the burden of post-stroke OD.  
49  
50

51  
52 This systematic review can help as a first step to induce changes in the provision of clinical  
53  
54 services for this very prevalent and serious disorder.  
55  
56  
57  
58  
59  
60

1  
2  
3  
4 Unpublished material and abstracts will not be included in this systematic review.  
5

6 It is possible that not all studies will be encountered despite the developed strategy.  
7  
8

9 A publication bias could affect the results of this systematic review.  
10  
11  
12  
13  
14  
15  
16  
17  
18  
19  
20  
21  
22  
23  
24  
25  
26  
27  
28  
29  
30  
31  
32  
33  
34  
35  
36  
37  
38  
39  
40  
41  
42  
43  
44  
45  
46  
47  
48  
49  
50  
51  
52  
53  
54  
55  
56  
57  
58  
59  
60

## INTRODUCTION

Oropharyngeal Dysphagia (OD) is a major disorder following stroke with a high incidence in acute post-stroke patients (37-78%).<sup>[1]</sup> OD can improve after the first weeks of the stroke, however it persists in as many as 50% of patients.<sup>[2]</sup> OD, which is classified in the latest editions of the International Classification of Diseases (ICD-10) promoted by the World Health Organization (3), can produce alterations in both the efficacy and the safety of deglutition. Impaired safety of swallow causes malnutrition and/or dehydration in up to 25% of patients and impaired safety of swallow may lead to aspiration pneumonia with high mortality rates.<sup>[1, 4-5]</sup> However, still today, most patients do not receive comprehensive care and post-stroke OD is an underdiagnosed and undertreated condition worldwide. OD is an easy and inexpensive stroke complication to diagnose. Position Statements of the European Society for Swallowing Disorders recommend all stroke patients should be screened for OD with available, easy to use and validated screening tools.<sup>[6]</sup> If OD is diagnosed, the appropriate volume and viscosity of liquids and texture of solid food must be selected to avoid penetrations and aspirations. Moreover, screening and treatment of malnutrition and dehydration, and screening and promotion of good oral health practices among these patients should also be implemented to reduce bacterial colonization by respiratory pathogens.<sup>[7-8]</sup>

Early detection and treatment of OD in post-stroke patients can avoid these complications and reduce hospital stays, readmissions, aspiration pneumonia and mortality rates, as well as the use of some medication such as antibiotics.<sup>[9]</sup> Taking into account all these secondary complications related to post stroke OD, this illness could have a high economic impact on health care costs. The correct treatment of this illness could lead to considerable savings in

1  
2  
3  
4 sanitary costs. Apart from acute in-hospital costs due to OD complications, there are also  
5  
6 other costs related to post-stroke OD, such as rehabilitation care, institutionalization, direct  
7  
8 non-healthcare costs, or indirect costs due to productivity losses. The chronic nature of OD  
9  
10 means medical costs related to patient care outside acute hospital attention must be taken  
11  
12 into account. The knowledge of costs related to this post-stroke disorder can lead to a better  
13  
14 understanding of its impact. Our hypothesis is that the impact of OD on the health-economic  
15  
16 and social costs of stroke is high and that minimal care of OD is economically sounder than  
17  
18 low care of OD. Therefore our aim is to quantify the cost of illness of acute and chronic post-  
19  
20 stroke OD. It is important to understand the economic burden in order to change clinical  
21  
22 practice. However, costs associated to acute and chronic OD in stroke patients have been  
23  
24 poorly studied and are not well known. The objective of this systematic review is to assess  
25  
26 and summarize all the knowledge on the additional attributable cost of OD in post-stroke  
27  
28 patients.  
29  
30  
31  
32  
33

## 34 METHODS AND ANALYSIS

35  
36 A systematic review of studies on the cost of OD and its complications (aspiration,  
37  
38 malnutrition, dehydration, aspiration pneumonia or death) in stroke patients will be  
39  
40 performed from hospital, health care system and social perspectives. The main outcome of  
41  
42 interest is the additional costs attributable to post-stroke OD. This systematic review will be  
43  
44 performed during 2018.  
45  
46  
47

### 48 **Literature search**

49  
50 We will search MEDLINE using Pubmed and EMBASE using Ovid. We will search on the  
51  
52 National Health Service Economic Evaluation Database (NHS EED) as well using the Center  
53  
54 for Reviews and Dissemination Database of the University of York. The Mesh and search  
55  
56  
57  
58  
59  
60



1  
2  
3  
4 terms used in the search strategy and their combination are described in table 1. No  
5  
6 publication date and no language restrictions will be imposed. Unpublished material and  
7  
8 abstracts will not be included in this systematic review.  
9

### 10 11 **Selection process**

12  
13 We will analyse all the studies identified through the literature search described in this  
14  
15 protocol using a double-phase process: an initial screening phase and a posterior  
16  
17 selection phase where studies will be included according to the review eligibility  
18  
19 criteria. The references of the studies included will be checked for additional eligible  
20  
21 studies.  
22  
23

24  
25 In the initial screening phase, the abstract and title of the studies will be analyzed to  
26  
27 eliminate studies not containing data on costs in post-stroke OD, its complications  
28  
29 (malnutrition, dehydration, frailty, respiratory infections and pneumonia) or relevant data or  
30  
31 information.  
32  
33

34  
35 In the second selection phase, studies will be included in the systematic review if they have  
36  
37 partial economic evaluation, studies that provide information about costs in adult (>18  
38  
39 years) post stroke patients with OD and/or its complications (malnutrition, dehydration,  
40  
41 frailty, respiratory infections and pneumonia) or economic evaluation studies in which the  
42  
43 cost of the disease has been estimated. Studies will be excluded if they are (a) oesophageal  
44  
45 dysphagia studies, (b) studies not related to OD, (c) studies in which OD is related to a cause  
46  
47 other than stroke, (d) duplicate publications of the same study or, (e) other causes  
48  
49 (explained above). This information will be presented in a content table. Full text of selected  
50  
51 studies will be carefully assessed according to a pre-established data collection notebook.  
52  
53

54  
55 Figure 1 summarizes the selection process. Two independent reviewers will participate in  
56  
57  
58  
59  
60

1  
2  
3  
4 this selection process. In case of disagreement over one or more studies, a third reviewer  
5  
6 will review the study and a final consensus will be made. The reason for excluding the study  
7  
8 will be recorded.  
9

### 10 11 **Data collection**

12  
13 Two reviewers will extract data from the selected studies and will register it in a standard  
14  
15 data collection form. In case of disagreement between them, a third reviewer opinion will be  
16  
17 required to reach an agreement and to take a final consensus decision. If necessary, we will  
18  
19 contact authors of included studies in order to ask for unreported information or to clarify  
20  
21 possible misunderstandings. Data directly obtained from the authors will be clearly  
22  
23 identified. We will report any assumption resulting from lost or unavailable information. To  
24  
25 manage study data, we will transfer all information in the data collection form to a spread  
26  
27 sheet. Data gathering will refer to main study characteristics, quality assessment and study  
28  
29 results. The data collection form used in the process is available in the appendix of this  
30  
31 protocol. The information to be obtained from each study is presented below:  
32  
33  
34

- 35  
36  
37 a. Study identification: First author, journal of publication, and year of publication.  
38  
39  
40 b. Main design characteristics: type of study (cost of illness study or another type of study  
41  
42 that provides cost of illness information in this field); epidemiological approach (cross-  
43  
44 sectional or longitudinal); retrospective or prospective data gathering; perspective of the  
45  
46 analysis (hospital, health care system, societal or insurance carrier perspective); time  
47  
48 horizon; use of temporary discount rate; sensitivity analysis (yes/no); presence of a control  
49  
50 group (patients not affected by OD); location/setting.  
51  
52  
53  
54  
55  
56  
57  
58  
59  
60

1  
2  
3  
4 c. Study sample: sample size; socio-demographic data (age, average and range; gender);  
5  
6 patient inclusion and exclusion criteria; patient's functional capacity (RANKIN, Barthel);  
7  
8 patient's comorbidities (Charlson); stroke type (ischemic or haemorrhagic); NIHSS scale  
9  
10 and/or Canadian scale on admission and on discharge; fibrinolysis treatment (yes/no);  
11  
12 endovascular treatment (yes/no); method used to diagnose OD (videofluoroscopy (VFS),  
13  
14 fiberoptic endoscopic evaluation of swallowing (FEES), volume-viscosity swallowing test (V-  
15  
16 VST), or other bedside methods ); nutritional assessment; discharge destination  
17  
18 (rehabilitation ward, nursing home, , domicile).  
19  
20  
21

22 d. Elements of cost considered: Direct health care costs (hospitalization, institutionalization  
23  
24 in a nursing home, primary care visits, visits to the nutritionist, physical therapist, speech  
25  
26 therapist, ambulance, medication, diagnostic tests, special diets, etc.), direct non-health care  
27  
28 costs (social services and transportation costs), and indirect costs (productivity losses).  
29  
30

31 e. Data source: medical registries, MEDICARE databases, national patient databases,  
32  
33 insurance databases, data collected from individual research groups, data collected from  
34  
35 individual hospitals.  
36  
37

38 f. Study results: The primary outcome will be the additional cost of OD in post-stroke  
39  
40 patients reported in monetary units (euros). If the studies provide specific breakdown of  
41  
42 costs, we will report this information (direct hospital costs, rehabilitation care costs, direct  
43  
44 non-healthcare costs, indirect costs and productivity loss). We will also collect data on  
45  
46 quantities of health and social resource consumption, currencies used and whether the  
47  
48 study shows total or incremental costs. Whenever possible, the cost adjusted for the  
49  
50 severity of the stroke or other confounding factors will be considered.  
51  
52  
53  
54  
55  
56  
57  
58  
59  
60

### **Quality assessment, risk of bias in individual studies and meta bias**

Methodological quality and risk of bias and meta bias will be evaluated using Drummond's checklist for assessing economic evaluations.[10] This checklist provides a set of items applicable to a critical appraisal of health economic evaluation studies and includes the following three domains: study design, data collection and analysis and interpretation of results. Each checklist domain has different sections; there are 10 sections containing questions on the study and every section will be rated as "Yes/partly/no". A fourth option as "not available/not applicable" has been added since not all sections are adapted to studies like cost of illness studies. Drummond's original list consists of 35 points but we have adapted it and will only use the 25 points applicable to cost studies. We will give a global score for the quality of each study which we calculate dividing the total number of points rated as "yes" between the total points applicable for each study, and record it as a percentage.

### **Data synthesis**

A systematic meta-narrative synthesis will be made, so, we will present the results in narrative form. Findings and characteristics of the included studies will be summarized and explained in text and tables. We will present results in the text following this order: (i) data on costs related to post-stroke OD, (ii) data on costs related to OD complications in this order: (a)aspiration, (b)malnutrition, (c)dehydration, (d)aspiration pneumonia and (e)death. Data will be presented separately for controlled (incremental costs) and not-controlled studies (total costs), and according to the perspective in which costs are measured (hospital, healthcare system or societal perspective). Main study information will be presented and summarized in several tables of evidence. This presentation will be performed separately in

1  
2  
3  
4 the same way as in tables. No conversion of study data will be performed and all data will be  
5  
6 reported in the original format during the initial presentation of the results. One set of tables  
7  
8 of evidence will present main designs and sample characteristics as well as cost elements  
9  
10 considered and data source (available in appendix). Another set of tables will report data on  
11  
12 main results and quality assessment.  
13

14  
15 A weighted mean cost of post-stroke OD will be estimated for those studies with the same  
16  
17 perspective and time horizon and with similar design characteristics. Mean cost will be  
18  
19 weighted by sample size. No other quantitative methods of synthesizing data will be  
20  
21 performed. Moreover, evidence obtained from studies will be synthesized through a  
22  
23 qualitative synthesis method, using a meta-narrative method. In this section, we will take  
24  
25 into account the risk of bias information obtained from each study. No study will be  
26  
27 eliminated based on its risk of bias, but we will assess how risk of bias can affect the main  
28  
29 results and outcome measures. To present this data synthesis of results correctly, we will  
30  
31 follow the recommendations stated in the guidance from the Centre for Reviews and  
32  
33 Dissemination.[11]  
34  
35  
36  
37

### 38 **Confidence in cumulative evidence**

39  
40 We will assess confidence and strength of evidence in this systematic review using GRADE  
41  
42 (Grading of Recommendations Assessment, Development and Evaluation) methodology.[12]  
43  
44 GRADE is a tool designed to assess the strength of the summarized evidence across studies  
45  
46 in systematic reviews by evaluating both study limitations, imprecision, inconsistency of  
47  
48 results, indirectness of evidence, publication bias, magnitude of the effect and the presence  
49  
50 of confounders that minimize the effect. Finally, we will rate the strength of evidence across  
51  
52  
53  
54  
55  
56  
57  
58  
59  
60

1  
2  
3  
4 studies as high, moderate, low or very low and we will make an evidence profile with a  
5  
6 detailed quality assessment.  
7

### 8 **PRISMA statement**

9  
10 Systematic reviews are fundamental instruments to assess all the evidence related to a topic  
11  
12 precisely and trustworthily. Nowadays, systematic reviews are key tools in updating the  
13  
14 knowledge on a certain topic, achieving conclusions on available evidence, and taking  
15  
16 decisions in the health care environment. Because of this, systematic reviews must follow an  
17  
18 exhaustive and accurate methodology and need to be reported with clarity and  
19  
20 transparency. For this reason, we will use the methodology proposed by PRISMA (Preferred  
21  
22 Reporting Items for Systematic review and Meta-Analyses) to carry out this systematic  
23  
24 review.[13] In this protocol, PRISMA –P annex (Preferred Reporting Items for Systematic  
25  
26 Reviews and Meta-Analysis Protocols) has been used. PRISMA-P is a specific PRISMA section  
27  
28 to develop protocols. It can be used as a guideline to develop protocols for systematic  
29  
30 reviews according to PRISMA methodology. Moreover, PRISMA-P offers study examples for  
31  
32 each item included in the protocol. These examples are extracted from studies that have  
33  
34 been relevant in their respective fields, reported with high quality and carried out using  
35  
36 accurate methodology.[14] We need to use protocols to increase work quality and reduce to  
37  
38 the maximum the risk of bias secondary to mistaken internal methodology and inaccurate  
39  
40 reporting in order to develop systematic reviews that can lead to reliable results to help in  
41  
42 decision-making, improve backup for future investigation and serve as a summary of the  
43  
44 available evidence on a certain topic. For all these reasons, we use PRISMA as a reference in  
45  
46 this work.  
47  
48  
49  
50  
51  
52  
53  
54  
55  
56  
57  
58  
59  
60

## ETHICS AND DISSEMINATION

The results of this systematic review will be published in a peer-reviewed journal. This systematic review is the first part of a research project aiming to evaluate the health economic and social costs of OD in stroke patients to better understand and raise awareness on minimal care for this common and severe complication. The full extent of this project will include a) a systematic review of the literature on the cost of OD after stroke; b) a systematic review of the literature on full economic evaluations of interventions related to OD; c) a health economic analysis of a study on the prevalence and evolution of OD in patients with stroke (with one year follow-up) to assess the cost of the illness; and d) a study on the cost-effectiveness of compensatory vs. active interventions to improve swallowing function in these patients.

## PATIENT AND PUBLIC INVOLVEMENT STATEMENT

Patients will not be involved in this research study.

## AUTHORS' CONTRIBUTION

S. Marin is the guarantor. S. Marin drafted the first version of this manuscript. All authors contributed on the design, provided a critical revision and read and approval the final revision of this protocol. P. Clave provided expertise on post-stroke OD. All authors contributed to the development of the introduction (rationales and objectives), the eligibility criteria, the selection of the information sources, the search strategy, the selection process, the risk of bias, data extraction criteria data synthesis and meta-bias.

## ACKNOWLEDGMENTS

We would like to acknowledge Agustí Viladot, member of Mataró Hospital library service, for helping with search strategy.

## FUNDING STATEMENT

This study is funded by an educational grant from Nutricia Advanced Medical Nutrition. This study is supported by Fundació Salut del Consorci Sanitari del Maresme, Ciberehd (in turn supported by the Instituto de Salud Carlos III, Barcelona, Spain) and Fundació de Recerca en Gastroenterologia (FUREGA). The sponsor has no role in the development of this study.

## COMPETING INTERESTS STATEMENT

The authors affirm that there are no conflicts of interest.



## FULL REFERENCES

- 1 Martino R, Foley N, Bhogal S, et al. Dysphagia After Stroke—Incidence, Diagnosis, and Pulmonary Complications. *Stroke* 2005;36:2756-2763.
- 2 Mann G, Hankey GJ, Cameron D. Swallowing function after stroke: prognosis and prognostic factors at 6 months. *Stroke* 1999;30(4):744-8.
- 3 WHO, International classification of disease [online], URL:[<http://www.who.int/classifications/icd/en>] [Date accessed: February 2018].
- 4 Clavé P, de Kraa M, Arreola V, et al. The effect of bolus viscosity on swallowing function in neurogenic dysphagia. *Aliment Pharmacol Ther* 2006;24(9):1385-94.
- 5 Cook IJ, Kahrilas PJ. AGA technical review on management of oropharyngeal dysphagia. *Gastroenterology* 1999;116(2):455-78.
- 6 Schepp SK, Tirschwell DL, Miller RM, et al. Swallowing screens after acute stroke: a systematic review. *Stroke* 2012;43(3):869-71.
- 7 van der Maarel-Wierink CD, Vanobbergen JN, Bronkhorst EM, et al. Oral health care and aspiration pneumonia in frail older people: a systematic literature review. *Gerodontology* 2013;30(1):3-9.
- 8 Seedat J, Penn C. Implementing oral care to reduce aspiration pneumonia amongst patients with dysphagia in a South African setting. *S Afr J Commun Disord* 2016;63(1).
- 9 Ickenstein GW, Riecker A, Höhlig C, et al. Pneumonia and in-hospital mortality in the context of neurogenic oropharyngeal dysphagia (NOD) in stroke and a new NOD step-wise concept. *J Neurol* 2010;257(9):1492-9.

1  
2  
3  
4 10 Drummond MF, O'Brien B, Torrance GW, et al. Methods for the economic evaluation of  
5  
6 healthcare programmes. 2nd ed. Oxford. Oxford University Press 1997.  
7

8  
9 11 Centre for Reviews and Dissemination. Systematic Reviews: CRD's Guidance for  
10  
11 Undertaking Reviews in Health Care. York: Centre for Reviews and Dissemination, University  
12  
13 of York 2009.  
14

15  
16 12 Guyatt G, Oxman AD, Akl EA, et al. GRADE guidelines: 1. Introduction-GRADE evidence  
17  
18 profiles and summary of findings tables. *J Clin Epidemiol* 2011;64(4):383-94.  
19

20  
21  
22 13 Liberati A, Altman DG, Tetzlaff J, et al. The PRISMA Statement for Reporting Systematic  
23  
24 Reviews and Meta-Analyses of Studies That Evaluate HealthCare Interventions: Explanation  
25  
26 and Elaboration. *BMJ* 2009;339:b2700.  
27

28  
29 14 Shamseer L, Moher D, Clarke M, et al. Preferred reporting items for systematic review  
30  
31 and meta-analysis protocols (PRISMA-P) 2015: elaboration and explanation. *BMJ*  
32  
33 2015;350:g7647  
34  
35  
36  
37  
38  
39  
40  
41  
42  
43  
44  
45  
46  
47  
48  
49  
50  
51  
52  
53  
54  
55  
56  
57  
58  
59  
60

**Table 1: Search terms and MeSH terms used in the bibliographic search**

| Terms related to Oropharyngeal Dysphagia and connected among themselves by "OR"                                                                                                                                                                                                                                                                                                                                                                                                                                                                                                                                                                                                          | Terms related to Stroke and connected among themselves by "OR"                                                                                                                                                                  | Terms related to Health Economics and connected among themselves by "OR"                                                                                                                                                                                                                                                                                                                                                                                                                                                                                                                                                  |
|------------------------------------------------------------------------------------------------------------------------------------------------------------------------------------------------------------------------------------------------------------------------------------------------------------------------------------------------------------------------------------------------------------------------------------------------------------------------------------------------------------------------------------------------------------------------------------------------------------------------------------------------------------------------------------------|---------------------------------------------------------------------------------------------------------------------------------------------------------------------------------------------------------------------------------|---------------------------------------------------------------------------------------------------------------------------------------------------------------------------------------------------------------------------------------------------------------------------------------------------------------------------------------------------------------------------------------------------------------------------------------------------------------------------------------------------------------------------------------------------------------------------------------------------------------------------|
| 1."Oropharyngeal Dysphagia"<br>2."Dysphag*"<br>3."Dysphagia therapy"<br>4."Deglutition"[Mesh]<br>5."Deglutition Disorders"[Mesh]<br>6."Oropharynx/abnormalities"[Mesh]<br>7."Oropharynx/diagnosis"[Mesh]<br>8."Oropharynx/diagnostic imaging"[Mesh]<br>9."Oropharynx/pathology"[Mesh]<br>10."Oropharynx/pharmacology"[Mesh]<br>11."Oropharynx/physiopathology"[Mesh]<br>12."Oropharynx/therapy"[Mesh]<br>13."Pneumonia, aspiration"[Mesh]<br>14."Respiratory Aspiration"[Mesh]<br>15."Pneumonia/etiology"[Mesh]<br>16."Pneumonia/prevention and control"[Mesh]<br>17."Nutritional Status"[Mesh]<br>18."Nutrition Assessment"[Mesh]<br>19."Malnutrition"[Mesh]<br>20."Enteral Nutrition*" | 21."Stroke"[Mesh]<br>22."Stroke discharge"<br>23."Post-stroke"<br>24."Stroke Rehabilitation"<br>[Mesh]<br>25."Brain Ischemia/<br>complications"[Mesh]<br>26."Cerebral<br>Infarction"[Mesh]<br>27."Cerebral<br>Hemorrhage"[Mesh] | 28."Economics"[Mesh]<br>29."Economics" [Subheading]<br>30."Models, Economic"[Mesh]<br>31."Cost effective*"<br>32.Cost[WORD]<br>33.Costs[WORD]<br>34."Health Resources"[Mesh]<br>35."Tertiary Care<br>Centers/economics"[Mesh]<br>36."Hospitalization/economics"[M<br>esh]<br>37."Rehabilitation<br>Centers/economics"[Mesh]<br>38."Physical Therapy<br>Modalities/economics"[Mesh]<br>39."Length of Stay/<br>economics"[Mesh]<br>40."Medicare/economics" [Mesh]<br>41."Emergency Medical<br>Services/economics" [Mesh]<br>42."Food, Formulated/<br>economics"[Mesh]<br>43."Cerebrovascular Disorders/<br>economics"[Mesh] |

Terms, detailed in the three columns above, related to Oropharyngeal Dysphagia, Stroke and Health Economics will be connected using "AND".

1  
2  
3  
4 **Figure 1: Selection process, flow diagram.**  
5  
6  
7  
8  
9  
10  
11  
12  
13  
14  
15  
16  
17  
18  
19  
20  
21  
22  
23  
24  
25  
26  
27  
28  
29  
30  
31  
32  
33  
34  
35  
36  
37  
38  
39  
40  
41  
42  
43  
44  
45  
46  
47  
48  
49  
50  
51  
52  
53  
54  
55  
56  
57  
58  
59  
60

For peer review only

Figure 1: Selection process, flow diagram

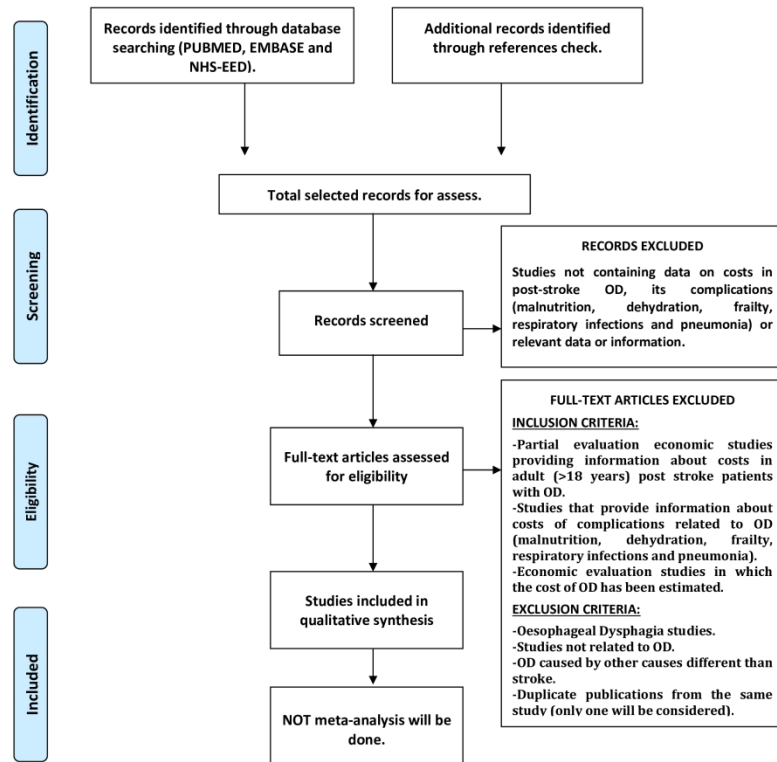

Figure 1: Selection process, flow diagram

209x297mm (300 x 300 DPI)

# BMJ Open

## Cost of Oropharyngeal Dysphagia after Stroke: protocol for a systematic review.

|                                 |                                                                                                                                                                                                                                                                                                                 |
|---------------------------------|-----------------------------------------------------------------------------------------------------------------------------------------------------------------------------------------------------------------------------------------------------------------------------------------------------------------|
| Journal:                        | <i>BMJ Open</i>                                                                                                                                                                                                                                                                                                 |
| Manuscript ID                   | bmjopen-2018-022775.R1                                                                                                                                                                                                                                                                                          |
| Article Type:                   | Protocol                                                                                                                                                                                                                                                                                                        |
| Date Submitted by the Author:   | 10-Jul-2018                                                                                                                                                                                                                                                                                                     |
| Complete List of Authors:       | Marin, Sergio; Consorci Sanitari del Maresme, Pharmacy Department Serra-Prat, Mateu; Consorci Sanitari del Maresme, Unitat de Recerca Ortega, Omar; Consorci Sanitari del Maresme, Gastrointestinal Physiology Laboratory<br>Clave, Pere; Consorci Sanitari del Maresme, Gastrointestinal Physiology Laboratory |
| <b>Primary Subject Heading</b>: | Health economics                                                                                                                                                                                                                                                                                                |
| Secondary Subject Heading:      | Gastroenterology and hepatology, Neurology                                                                                                                                                                                                                                                                      |
| Keywords:                       | Oropharyngeal Dysphagia, Pneumonia, aspiration, Malnutrition, Stroke < NEUROLOGY, Economics < TROPICAL MEDICINE, Health Resources                                                                                                                                                                               |
|                                 |                                                                                                                                                                                                                                                                                                                 |

SCHOLARONE™  
Manuscripts

1  
2  
3  
4 TITLE5  
6 Cost of Oropharyngeal Dysphagia after Stroke: protocol for a systematic review.  
78  
9 AUTHORS10  
11 1. Marin Rubio, Sergio (Corresponding Author). Consorci Sanitari del Maresme, Pharmacy,  
12 Mataro, Catalunya, ES.  
1314  
15 Postal address: Consorci Sanitari del Maresme, Carretera de Cirera, w/n. Mataro, Barcelona,  
16 ES 08304.  
1718  
19 Email: smarin@csgdm.cat  
2021  
22 Tel. 93 741 77 00. Fax.93 741 77 53.  
2324  
25 2. Serra Prat, Mateu. Consorci Sanitari del Maresme, Research Unit, Mataro, Catalunya, ES.  
2627  
28 Centro de Investigación Biomédica en Red de enfermedades hepáticas y digestivas  
29 (CIBERehd), Instituto de Salud Carlos III, Barcelona Catalunya, ES.  
3031  
32 3. Ortega Fernandez, Omar. Consorci Sanitari del Maresme, Gastrointestinal Physiology  
33 Laboratory, Universitat Autònoma de Barcelona, Mataro, Catalunya, ES. Centro de  
34 Investigación Biomédica en Red de enfermedades hepáticas y digestivas (CIBERehd),  
35 Instituto de Salud Carlos III, Barcelona Catalunya, ES.  
36  
3738  
39 4. Clavé Civit, Pere. Consorci Sanitari del Maresme, Gastrointestinal Physiology  
40 Laboratory, Universitat Autònoma de Barcelona, Mataro, Catalunya, ES. Centro de  
41 Investigación Biomédica en Red de enfermedades hepáticas y digestivas (CIBERehd),  
42 Instituto de Salud Carlos III, Barcelona Catalunya, ES.  
43  
44  
45  
46  
47  
48  
4950  
51 WORD COUNT52  
53  
54 4528  
55  
56  
57  
58  
59  
60

## ABSTRACT

### **Introduction:**

Oropharyngeal dysphagia (OD) is a major disorder following stroke. OD can produce alterations in both the efficacy and safety of deglutition and may result in malnutrition, dehydration, frailty, respiratory infections and pneumonia. These complications can be avoided by early detection and treatment of OD in post-stroke patients and hospital stays, medication and mortality rates can be reduced. In addition to acute in-hospital costs from OD complications, there are other costs related to post-stroke OD such as direct non-healthcare costs or indirect costs. However, costs associated with acute and chronic OD in stroke patients have been poorly studied and are not well known. The objective of this systematic review is to assess and summarize literature on the costs related to OD in post-stroke patients.

### **Methods and analysis:**

A systematic review of studies on the cost of OD and its complications (aspiration, malnutrition, dehydration, aspiration pneumonia and death) in stroke patients will be performed from the perspectives of the hospital, the health care system and/or the society. The main outcomes of interest are the costs related to post-stroke OD. We will search MEDLINE, EMBASE and the National Health Service Economic Evaluation Database (NHS EED). Studies will be included if they are partial economic evaluation studies, studies that provide information on costs in adult (>17 years) post-stroke patients with OD and/or its complications (malnutrition, dehydration, frailty, respiratory infections and pneumonia) or economic evaluation studies in which the cost of the disease has been estimated. Studies



1  
2  
3  
4 will be excluded if they refer to oesophageal dysphagia or OD caused by causes other than  
5  
6 stroke. Main study information will be presented and summarized in tables, separately for  
7  
8 studies that provide incremental costs attributable to OD or its complications and studies  
9  
10 that report the effect of OD or its complications on total costs of stroke, and according to  
11  
12 the perspective from which costs were measured.  
13  
14

#### 15 16 **Ethics and dissemination:**

17  
18 The results of this systematic review will be published in a peer-reviewed journal.  
19  
20

21 **PROSPERO registration number: CRD42018099977.**  
22  
23

#### 24 **KEYWORDS**

25  
26 Oropharyngeal Dysphagia  
27  
28

29  
30 Deglutition Disorders  
31  
32

33  
34 Pneumonia, aspiration  
35  
36

37  
38 Respiratory Aspiration  
39  
40

41  
42 Malnutrition  
43  
44

45  
46 Stroke  
47  
48

49  
50 Stroke Rehabilitation  
51  
52

53  
54 Cerebral Infarction  
55  
56

57  
58 Cerebral Hemorrhage  
59  
60

Economics

Health Resources

## STRENGTHS AND LIMITATIONS OF THIS STUDY

This systematic review protocol was performed using the PRISMA recommendations.

The proposed methodology will allow us to accurately report the evidence on this topic and to assess the quality of the selected studies.

The bibliographic search considers the bibliographic databases Medline and Embase.

Some relevant studies may not be identified despite the strict search strategy performed.

Unpublished material and abstracts will not be included in this systematic review.

A potential bias towards studies demonstrating high costs of OD could affect the results of this systematic review.

Costs are very context-specific so they are difficult to extrapolate from one setting to another.

Quantitative synthesis of results is not considered because of the suspected heterogeneity in the design, study population, the cost elements considered, and the perspectives and follow-up considered.

## INTRODUCTION

Oropharyngeal Dysphagia (OD) is a major disorder following stroke with a high incidence in acute post-stroke patients (37-78%).<sup>[1]</sup> OD can improve after the first weeks of the stroke, however it persists in as many as 50% of patients.<sup>[2]</sup> OD, which is classified in the latest editions of the International Classification of Diseases (ICD-10) promoted by the World Health Organization (3), can produce alterations in both the efficacy and the safety of deglutition. Impaired efficacy of swallow causes malnutrition and/or dehydration in up to

1  
2  
3  
4 25% of patients and impaired safety of swallow may lead to aspiration pneumonia with high  
5  
6 mortality rates.[1,4-5] However, still today, most patients do not receive comprehensive  
7  
8 care and post-stroke OD is an underdiagnosed and undertreated condition worldwide. OD is  
9  
10 an inexpensive complication to diagnose. For OD diagnosis, well-established methods and  
11  
12 tools exist, such as routine screening followed by expert assessment. Position Statements of  
13  
14 the European Society for Swallowing Disorders recommend that all stroke patients should be  
15  
16 screened for OD with available, easy to use and validated screening tools.[6] Evidence-based  
17  
18 and effective treatment for OD is mainly oriented to compensating swallow impairments  
19  
20 through adaptation of fluid viscosity and solid food textures to avoid aspiration and choking,  
21  
22 and improving nutritional status and oral health to avoid respiratory infections. Advances in  
23  
24 treatment are mainly focused on peripheral stimulation strategies and central, noninvasive  
25  
26 stimulation strategies. Among these methods, transcutaneous and intrapharyngeal electrical  
27  
28 stimulation, pharmacological stimulation through TRPV agonists and non invasive brain  
29  
30 stimulation techniques (NIBS), repetitive transcranial magnetic stimulation, and transcranial  
31  
32 direct current stimulation are emerging treatments for swallow dysfunction among post-  
33  
34 stroke patients.[7] The aim of these interventions is to restore the swallow function.  
35  
36  
37  
38  
39  
40

41 Screening and treatment of malnutrition and dehydration are also two important challenges  
42  
43 for these patients. Moreover, screening and promotion of good oral health practices among  
44  
45 these patients should be implemented to reduce bacterial colonization by respiratory  
46  
47 pathogens.[8-9]  
48  
49

50  
51 Regardless of its etiology, OD has been related to longer length of stay, and higher inpatient  
52  
53 costs, likelihood of being transferred to post-acute care facility and inpatient mortality  
54  
55 during hospitalization.[10] Early detection and treatment of OD in post-stroke patients can  
56  
57  
58  
59  
60

1  
2  
3  
4 diminish these complications and reduce hospital stays, readmissions, aspiration pneumonia  
5  
6 and mortality rates, as well as the use of some medication such as antibiotics.[11]Taking into  
7  
8 account all these secondary complications related to post stroke OD, this illness could have a  
9  
10 high economic impact on health care costs. The correct treatment of this illness could lead  
11  
12 to considerable savings in health care costs. In addition to acute in-hospital costs due to OD  
13  
14 complications, there are other costs related to post-stroke OD such as rehabilitation care,  
15  
16 institutionalization, direct non-healthcare costs, and indirect costs due to loss of  
17  
18 productivity. The chronic nature of OD means medical costs related to patient care outside  
19  
20 the acute hospital setting must be taken into account. Knowing costs related to this post-  
21  
22 stroke disorder can lead to a better understanding of its impact. Our hypothesis is that the  
23  
24 impact of OD on the health-economic and social costs of stroke is high and that minimal care  
25  
26 of OD is economically sounder than low care of OD. Therefore our aim is to quantify the cost  
27  
28 of illness of acute and chronic post-stroke OD. It is important to understand the economic  
29  
30 burden in order to change clinical practice. However, costs associated to acute and chronic  
31  
32 OD in stroke patients have been poorly studied and are not well known. One study has  
33  
34 shown that presenting OD after stroke was associated with high mortality rates during  
35  
36 hospital stay and was an independent risk factor for prolonged length of hospital stay and to  
37  
38 be institutionalized after hospital discharge; OD was also an independent risk factor for  
39  
40 poorer functional capacity and increased risk of mortality 3 months after the stroke episode.  
41  
42 This study stated these factors were of great importance not only from the perspective of  
43  
44 patient health, but also because of their social and economic burden.[12] The objective of  
45  
46 this systematic review is to assess and summarize all the knowledge on the costs related to  
47  
48 OD in post-stroke patients.  
49  
50  
51  
52  
53  
54  
55  
56  
57  
58  
59  
60

## METHODS AND ANALYSIS

A systematic review of studies on the cost of OD and its complications (aspiration, malnutrition, dehydration, aspiration pneumonia or death) in stroke patients will be performed from hospital, health care system and social perspectives. The main outcome of interest is the costs related to post-stroke OD. This systematic review will be performed during 2018.

### **PRISMA statement**

Systematic reviews are fundamental instruments to assess all the evidence related to a topic precisely and trustworthily. Nowadays, systematic reviews are key tools in updating the knowledge on a certain topic, achieving conclusions on available evidence, and taking decisions in the health care environment. Because of this, systematic reviews must follow an exhaustive and accurate methodology and need to be reported with clarity and transparency. For this reason, we will use the methodology proposed by PRISMA (Preferred Reporting Items for Systematic review and Meta-Analyses) to carry out this systematic review.[13] In this protocol, PRISMA-P annex (Preferred Reporting Items for Systematic Reviews and Meta-Analysis Protocols) has been used. PRISMA-P is a specific PRISMA section to develop protocols. It can be used as a guideline to develop protocols for systematic reviews according to PRISMA methodology. Moreover, PRISMA-P offers study examples for each item included in the protocol. These examples are extracted from studies that have been relevant in their respective fields, reported with high quality and carried out using accurate methodology.[14] We need to use protocols to increase work quality and reduce to the maximum the risk of bias secondary to mistaken internal methodology and inaccurate reporting. Protocols are key tools for developing systematic reviews that can lead to reliable

1  
2  
3  
4 results to help in decision-making, improve backup for future investigation and serve as a  
5  
6 summary of the available evidence on a certain topic. For all these reasons, we use PRISMA  
7  
8 as a reference in this work.  
9

### 10 11 **Literature search**

12  
13 We will search MEDLINE using Pubmed and EMBASE using Ovid. We will search on the  
14  
15 National Health Service Economic Evaluation Database (NHS EED) as well using the Center  
16  
17 for Reviews and Dissemination Database of the University of York. The Mesh and search  
18  
19 terms used in the search strategy and their combination are described in Table 1. Using this  
20  
21 search strategy in MEDLINE using Pubmed, a total of seventy articles were found in June  
22  
23 2018. No publication date and no language restrictions will be imposed. Unpublished  
24  
25 material and abstracts will not be included in this systematic review.  
26  
27  
28

### 29 30 **Selection process**

31  
32 We will analyse all the studies identified through the literature search described in this  
33  
34 protocol using a double-phase process: an initial screening phase and a subsequent selection  
35  
36 phase where studies will be included according to the review eligibility criteria. The  
37  
38 references of the studies included will be checked for additional eligible studies.  
39

40  
41 In the initial screening phase, the abstract and title of the studies will be analyzed to  
42  
43 eliminate studies not containing data on costs in post-stroke OD, its complications  
44  
45 (malnutrition, dehydration, frailty, respiratory infections and pneumonia) or relevant data or  
46  
47 information. In the abstract or title there must appear an economic term such as “costs” or  
48  
49 “resources consumption” and “dysphagia” or “malnutrition, dehydration, frailty, respiratory  
50  
51 infections and pneumonia” with “stroke”. This selection process will be done by one sole  
52  
53 reviewer and, subsequently, a second reviewer will check the eliminated abstracts.  
54  
55  
56  
57  
58  
59

1  
2  
3  
4 In the second selection phase, studies will be included in the systematic review if they have  
5  
6 partial economic evaluation, studies that provide information about costs in adult (>17years)  
7  
8 post-stroke patients with OD and/or its complications (malnutrition, dehydration, frailty,  
9  
10 respiratory infections and pneumonia) or economic evaluation studies in which the cost of  
11  
12 the disease has been estimated. Studies will be excluded if they are (a) oesophageal  
13  
14 dysphagia studies, (b) studies not related to OD, (c) studies in which OD is related to a cause  
15  
16 other than stroke, (d) duplicate publications of the same study or, (e) other causes  
17  
18 (explained above). This information will be presented in a content table. Full text of selected  
19  
20 studies will be carefully assessed according to a pre-established data collection notebook.  
21  
22 Figure 1 summarizes the selection process. Two independent reviewers will participate in  
23  
24 this selection process. In case of disagreement over one or more studies, a third reviewer  
25  
26 will review the study and a final consensus will be made. The reason for excluding the study  
27  
28 will be recorded. No restrictions related to the size of the sample will be imposed.  
29  
30  
31  
32

### 33 34 **Data collection**

35  
36 Two reviewers will extract data from the selected studies and will register it in a standard  
37  
38 data collection form. In case of disagreement between them, a third reviewer opinion will be  
39  
40 required to reach an agreement and to take a final consensus decision. If necessary, we will  
41  
42 contact authors of included studies in order to ask for unreported information or to clarify  
43  
44 possible misunderstandings. Data directly obtained from the authors will be clearly  
45  
46 identified. We will report any assumption resulting from lost or unavailable information. To  
47  
48 manage study data, we will transfer all information in the data collection form to a  
49  
50 spreadsheet. Data gathering will refer to main study characteristics, quality assessment and  
51  
52 study results. The information to be obtained from each study is presented below:  
53  
54  
55  
56  
57  
58  
59  
60

- 1  
2  
3  
4 a. Study identification: First author, journal of publication, and year of publication.  
5  
6  
7 b. Main design characteristics: type of study (cost of illness study or another type of study  
8  
9 that provides cost of illness information in this field); epidemiological approach (cross-  
10  
11 sectional or longitudinal); retrospective or prospective data gathering; perspective of the  
12  
13 analysis (hospital, patient, health care system, societal or insurance carrier perspective);  
14  
15 time horizon; use of temporary discount rate; sensitivity analysis (yes/no); presence of a  
16  
17 control group (patients not affected by OD); location/setting.  
18  
19  
20  
21 c. Study sample characteristics: sample size; socio-demographic data (age, average and  
22  
23 range; gender); patient inclusion and exclusion criteria; patient's functional capacity  
24  
25 (RANKIN, Barthel); patient's comorbidities (Charlson); stroke type (ischemic or  
26  
27 haemorrhagic); NIHSS scale and/or Canadian Neurologic Scale on admission and on  
28  
29 discharge; fibrinolysis treatment (yes/no); endovascular treatment (yes/no); method used to  
30  
31 diagnose OD (videofluoroscopy (VFS), fiberoptic endoscopic evaluation of swallowing (FEES),  
32  
33 volume-viscosity swallowing test (V-VST), or other bedside methods); nutritional  
34  
35 assessment; discharge destination (rehabilitation ward, nursing home, domicile).  
36  
37  
38  
39 d. Elements of cost considered: Direct healthcare costs (hospital ward, intensive care unit,  
40  
41 emergency room, institutionalization in a nursing home, primary care visits and to  
42  
43 nutritionists, physical therapists, speech therapists, ambulance, medication, diagnostic tests,  
44  
45 special diets, tube-feeding, PEG-insertion, antibiotic consumption, pneumonia-related costs,  
46  
47 etc.), direct non-health care costs (social services and transportation costs), and indirect  
48  
49 costs (loss of productivity).  
50  
51  
52  
53  
54  
55  
56  
57  
58  
59  
60



1  
2  
3  
4 e. Data source: medical registries, MEDICARE databases, national patient databases,  
5  
6 insurance databases, data collected from individual research groups, data collected from  
7  
8 individual hospitals.  
9

10  
11 f. Study results: The primary outcome will be the costs related to OD in post-stroke patients  
12  
13 reported in monetary units (euros). If the studies provide specific breakdown of costs, we will  
14  
15 report this information (direct hospital costs, rehabilitation care costs, direct non-healthcare  
16  
17 costs, indirect costs and productivity loss, and intangible costs). We will also collect data on  
18  
19 quantities of health and social resource consumption, currencies used and whether the  
20  
21 study shows total or incremental costs. Whenever possible, the cost adjusted for the  
22  
23 severity of the stroke or other confounding factors will be considered.  
24  
25

26  
27 **Quality assessment, risk of bias in individual studies, meta bias and confidence in**  
28  
29 **cumulative evidence**  
30

31 Methodological quality and risk of bias and meta bias will be evaluated using Drummond's  
32  
33 checklist for assessing economic evaluations.[15] This checklist provides a set of items  
34  
35 applicable to a critical appraisal of health economic evaluation studies and includes the  
36  
37 following three domains: study design, data collection and analysis and interpretation of  
38  
39 results. Each checklist domain has different sections; there are 10 sections containing  
40  
41 questions on the study and every section will be rated as "Yes/partly/no". A fourth option as  
42  
43 "not available/not applicable" has been added since not all sections are adapted to studies  
44  
45 like cost of illness studies. Drummond's original list consists of 35 points but we have  
46  
47 adapted it and will only use the 25 points applicable to cost studies. We will give a global  
48  
49 score for the quality of each study which we calculate dividing the total number of points  
50  
51  
52  
53  
54  
55  
56  
57  
58  
59  
60

1  
2  
3  
4 rated as “yes” between the total points applicable for each study, and record it as a  
5  
6 percentage.

7  
8 We will assess confidence and strength of evidence in this systematic review using GRADE  
9  
10 (Grading of Recommendations Assessment, Development and Evaluation) methodology.[16]  
11  
12 GRADE is a tool designed to assess the strength of the summarized evidence across studies  
13  
14 in systematic reviews by evaluating both study limitations, imprecision, inconsistency of  
15  
16 results, indirectness of evidence, publication bias, magnitude of the effect and the presence  
17  
18 of confounders that minimize the effect. Finally, we will rate the strength of evidence across  
19  
20 studies as high, moderate, low or very low and we will make an evidence profile with a  
21  
22 detailed quality assessment.  
23  
24  
25

### 26 27 **Data synthesis**

28  
29 A systematic meta-narrative synthesis will be made, so, we will present the results in  
30  
31 narrative form. Findings and characteristics of the included studies will be summarized and  
32  
33 explained in text and tables. We will present results in the text following this order: (i) data  
34  
35 on costs related to post-stroke OD, (ii) data on costs related to OD complications in this  
36  
37 order: (a) aspiration, (b) malnutrition, (c) dehydration, (d) aspiration pneumonia and (e)  
38  
39 death. Data will be presented separately for those studies that provide incremental costs  
40  
41 attributable to OD or its complications from those studies that report the effect of OD or its  
42  
43 complications on total costs of stroke, and according to the perspective in which costs are  
44  
45 measured (hospital, patient, healthcare system, societal, or insurance carrier). Main study  
46  
47 information will be presented and summarized in several tables of evidence. This  
48  
49 presentation will be performed separately in the same way as in tables. No conversion of  
50  
51 study data will be performed and all data will be reported in the original format during the  
52  
53  
54  
55  
56  
57  
58  
59  
60

1  
2  
3  
4 initial presentation of the results. One set of tables of evidence will present main designs  
5  
6 and sample characteristics as well as cost elements considered and data source. Another set  
7  
8 of tables will report data on main results and quality assessment.  
9

10  
11 A weighted mean cost of post-stroke OD will be estimated for those studies with the same  
12  
13 perspective and time horizon and with similar design characteristics. Mean cost will be  
14  
15 weighted by sample size. No other quantitative methods of synthesizing data will be  
16  
17 performed. Moreover, evidence obtained from studies will be synthesized through a  
18  
19 qualitative synthesis method, using a meta-narrative method. In this section, we will take  
20  
21 into account the risk of bias information obtained from each study. No study will be  
22  
23 eliminated based on its risk of bias, but we will assess how risk of bias can affect the main  
24  
25 results and outcome measures. To present this data synthesis of results correctly, we will  
26  
27 follow the recommendations stated in the guidance from the Centre for Reviews and  
28  
29 Dissemination.[17]  
30  
31  
32  
33

34 **Glossary of terms in health economics:** [13, 18]  
35

36  
37 -Economic evaluation in healthcare: analytical methodology that aims to compare the costs  
38  
39 and the consequences in health of various alternatives (interventions, treatments,  
40  
41 programmes, etc.).  
42

43  
44 -Partial economic evaluation: economic evaluation technique that only compares the costs  
45  
46 of the various alternatives studied but does not consider their effects on health. Also called  
47  
48 cost analysis.  
49

50  
51 - Analysis perspective: point of view from which the analysis is focused and which  
52  
53 determines the cost elements to consider. Each perspective provides specific information for  
54  
55  
56  
57  
58  
59

1  
2  
3  
4 a particular entity, e.g. hospital perspective mainly includes acute in-hospital costs while  
5  
6 healthcare system perspective includes costs related to those medical costs beyond the  
7  
8 acute in-hospital stay. The societal perspective is the most complete because it includes  
9  
10 healthcare and non-healthcare costs and loss of productivity.  
11

12  
13 - Type of costs: cost studies classify costs as direct costs, indirect costs and intangible costs.  
14

- 15  
16 • Direct medical costs are those related to a healthcare intervention (e.g. hospital ward  
17  
18 or medication) and direct non-medical costs are those associated with provision of  
19  
20 medical services (e.g. transportation costs).  
21
- 22  
23 • Indirect costs are those related to productivity loss, morbidity, mortality or time  
24  
25 spent.  
26
- 27  
28 • Intangible costs are rarely studied and are those related to suffering and pain related  
29  
30 to a disease or treatment.  
31

32 -Discount rate: There is a preference to obtain benefits straight away and to delay costs.  
33

34  
35 When the time horizon is longer than one year, a temporary discount rate should be used to  
36  
37 allow costs and results that will occur over time to be measured at present values. An annual  
38  
39 3-5% discount rate is usually used.  
40

41 -Sensitivity analysis: Some decisions in the economic analysis are based on uncertain data.  
42

43  
44 The sensitivity analysis is aimed at testing the robustness of results of the economic  
45  
46 evaluation when changing the assumed values of some variables used in the analysis.  
47  
48  
49

50  
51 **PATIENT AND PUBLIC INVOLVEMENT STATEMENT:**  
52

53 It does not apply for this protocol.  
54  
55  
56  
57  
58  
59  
60

## ETHICS AND DISSEMINATION

The results of this systematic review will be published in a peer-reviewed journal. This systematic review is the first part of a research project aiming to evaluate the health economic and social costs of OD in stroke patients to better understand and raise awareness on minimal care for this common and severe complication. Complications of OD are related to three main aspects: a) impaired safety of swallow, causing the aspiration of respiratory pathogens to the airway; b) impaired nutritional status, leading to malnutrition, impaired immunity and frailty; and c) poor oral health and hygiene, associated with oral colonization by respiratory pathogens. It is necessary to treat these three aspects simultaneously with the aim of maximizing the number of patients treated with simple and cost-effective measures based on the best scientific evidence. This minimal and massive intervention is based on fluid and food texture adaptations, nutritional supplementation and oral hygiene.[19] The full extent of this project will include a) a systematic review of the literature on the cost of OD after stroke; b) a systematic review of the literature on full economic evaluations of interventions related to OD; c) a health economic analysis of a study on the prevalence and evolution of OD in patients with stroke (with one year follow-up) to assess the cost of the illness; and d) a study on the cost-effectiveness of compensatory vs. active interventions (those treatments for OD that aim to restore the impaired swallow function) to improve swallowing function in these patients. OD treatment is moving from compensatory strategies towards promoting brain plasticity, both to recover swallow function and to improve brain-related swallowing dysfunction.[7]

#### AUTHORS' CONTRIBUTION

Marin Rubio, Sergio is the guarantor. He drafted the first version of this manuscript. He provided expertise on health economics. He contributed to the development of the introduction (rationales and objectives), the eligibility criteria, the selection of the information sources, the search strategy, the selection process, the quality assessment, the data extraction criteria and the data synthesis. He read and approval the final revision of this protocol.

Serra Prat, Mateu provided expertise on investigation methodology and health economics. He provided important references for the development of the methodology of this work. He reviewed and made contributions on the methodology of all the sections of this protocol. He reviewed the correct use of all the economic terms included in this manuscript. He collaborated in writing the manuscript.

Ortega Fernandez, Omar provided expertise on post-stroke OD treatments and interventions. He contributed on the development of the data collection, quality assessment and data synthesis sections. He provided a critical revision of all the sections of this protocol. He collaborated in writing the manuscript. He collaborated in writing the manuscript.

Clavé Civit, Pere provided expertise on post-stroke OD. He reviewed the correct use of all the medical terms included in this manuscript. He contributed on the development and writing of the introduction. He provided a critical revision of all the sections of this protocol. He contributed to the correct following of the recommendations proposed by PRISMA.

All authors provided a critical revision and read and approval the final revision of this protocol.

#### ACKNOWLEDGMENTS

We would like to thank Agustí Viladot, member of Mataró Hospital library service, for helping with search strategy and Jane Lewis for reviewing the English. This work has been conducted within the framework of a doctoral thesis in medicine from the Department of Medicine of the Autonomous University of Barcelona.

#### FUNDING STATEMENT

This study is funded by an educational grant from Nutricia Advanced Medical Nutrition. This study is supported by Fundació Salut del Consorci Sanitari del Maresme, Ciberehd (in turn supported by the Instituto de Salud Carlos III, Barcelona, Spain) and Fundació de Recerca en Gastroenterologia (FUREGA). The sponsor has no role in the development of this study.

#### COMPETING INTERESTS STATEMENT

The authors affirm that there are no conflicts of interest.

#### FULL REFERENCES

- 1 Martino R, Foley N, Bhogal S, et al. Dysphagia After Stroke—Incidence, Diagnosis, and Pulmonary Complications. *Stroke* 2005;36:2756-2763.
- 2 Mann G, Hankey GJ, Cameron D. Swallowing function after stroke: prognosis and prognostic factors at 6 months. *Stroke* 1999;30(4):744-8.
- 3 WHO, International classification of disease [online], URL:[<http://www.who.int/classifications/icd/en>] [Date accessed: February 2018].
- 4 Clavé P, de Kraa M, Arreola V, et al. The effect of bolus viscosity on swallowing function in

1  
2  
3  
4 neurogenic dysphagia. *Aliment Pharmacol Ther* 2006;24(9):1385-94.

5  
6  
7 5 Cook IJ, KahrilasPJ. AGA technical review on management of oropharyngeal dysphagia.  
8  
9  
10 *Gastroenterology* 1999;116(2):455-78.

11  
12 6 Schepp SK, Tirschwell DL, Miller RM, et al. Swallowing screens after acute stroke: a  
13  
14  
15 systematic review. *Stroke* 2012;43(3):869-71.

16  
17 7 Cabib C, Ortega O, Kumru H, et al. Neurorehabilitation strategies for poststroke  
18  
19  
20 oropharyngeal dysphagia: from compensation to the recovery of swallowing function. *Ann N*  
21  
22 *Y Acad Sci* 2016;1380(1):121-138.

23  
24 8 van der Maarel-Wierink CD, Vanobbergen JN, Bronkhorst EM, et al. Oral health care and  
25  
26  
27 aspiration pneumonia in frail older people: a systematic literature review.  
28  
29 *Gerodontology* 2013;30(1):3-9.

30  
31 9 Seedat J, Penn C. Implementing oral care to reduce aspiration pneumonia amongst  
32  
33  
34 patients with dysphagia in a South African setting. *S Afr J Commun Disord* 2016;63(1).

35  
36 10 Patel DA, Krishnaswami S, Steger E, et al. Economic and survival burden of dysphagia  
37  
38  
39 among inpatients in the United States. *Dis Esophagus* 2018;31(1):1-7.

40  
41 11 Ickenstein GW, Riecker A, Höhlig C, et al. Pneumonia and in-hospital mortality in the  
42  
43  
44 context of neurogenic oropharyngeal dysphagia (NOD) in stroke and a new NOD step-wise  
45  
46 concept. *J Neurol* 2010;257(9):1492-9.

47  
48 12 Rofes L, Muriana D, Palomeras E, et al. Prevalence, risk factors and complications of  
49  
50  
51 oropharyngeal dysphagia in stroke patients: A cohort study. *Neurogastroenterol Motil.*  
52  
53  
54  
55  
56  
57  
58  
59  
60 2018;23:e13338.



1  
2  
3  
4 13 Liberati A, Altman DG, Tetzlaff J, et al. The PRISMA Statement for Reporting Systematic  
5  
6 Reviews and Meta-Analyses of Studies That Evaluate Health Care Interventions: Explanation  
7  
8 and Elaboration. *BMJ* 2009;339:b2700.  
9

10  
11 14 Shamseer L, Moher D, Clarke M, et al. Preferred reporting items for systematic review  
12  
13 and meta-analysis protocols (PRISMA-P) 2015: elaboration and explanation.  
14  
15 *BMJ*2015;350:g7647.  
16

17  
18 15 Drummond MF, O'Brien B, Torrance GW, et al. *Methods for the economic evaluation of*  
19  
20 *health care programmes*. 2nd ed. Oxford. Oxford University Press 1997.  
21

22  
23 16 Guyatt G, Oxman AD, Akl EA, et al. GRADE guidelines: 1. Introduction-GRADE evidence  
24  
25 profiles and summary of findings tables. *J Clin Epidemiol* 2011;64(4):383-94.  
26

27  
28 17 Centre for Reviews and Dissemination. *Systematic Reviews: CRD's Guidance for*  
29  
30 *Undertaking Reviews in Health Care*. York: Centre for Reviews and Dissemination, University  
31  
32 of York 2009.  
33

34  
35 18 Jo C. Cost-of-illness studies: concepts, scopes, and methods. *Clin Mol Hepatol*  
36  
37 2014;20(4):327-37.  
38

39  
40 19 Martín A, Ortega O, Roca M, Arús M, Clavé P. Effect of A Minimal-Massive Intervention in  
41  
42 Hospitalized Older Patients with Oropharyngeal Dysphagia: A Proof of Concept Study. *J Nutr*  
43  
44 *Health Aging* 2018;22(6):739-747.  
45  
46  
47  
48  
49  
50  
51  
52  
53  
54  
55  
56  
57  
58  
59  
60

**Table 1: Search terms and MeSH terms used in the bibliographic search**

| Terms related to Oropharyngeal Dysphagia and connected among themselves by "OR"                                                                                                                                                                                                                                                                                                                                                                                                                                                                                                               | Terms related to Stroke and connected among themselves by "OR"                                                                                                                                                    | Terms related to Health Economics and connected among themselves by "OR"                                                                                                                                                                                                                                                                                                                                                                                              |
|-----------------------------------------------------------------------------------------------------------------------------------------------------------------------------------------------------------------------------------------------------------------------------------------------------------------------------------------------------------------------------------------------------------------------------------------------------------------------------------------------------------------------------------------------------------------------------------------------|-------------------------------------------------------------------------------------------------------------------------------------------------------------------------------------------------------------------|-----------------------------------------------------------------------------------------------------------------------------------------------------------------------------------------------------------------------------------------------------------------------------------------------------------------------------------------------------------------------------------------------------------------------------------------------------------------------|
| 1.Oropharyngeal Dysphagia.tw.<br>2.Dysphag*<br>3.Dysphagia therapy/<br>4."Deglutition"[Mesh]<br>5.Deglutition Disorders"[Mesh]<br>6."Oropharynx/abnormalities"[Mesh]<br>7."Oropharynx/diagnosis"[Mesh]<br>8."Oropharynx/diagnostic imaging"[Mesh]<br>9."Oropharynx/pathology"[Mesh]<br>10."Oropharynx/pharmacology"[Mesh]<br>11."Oropharynx/physiopathology"[Mesh]<br>12."Oropharynx/therapy"[Mesh]<br>13."Pneumonia, aspiration"[Mesh]<br>14."Respiratory Aspiration"[Mesh]<br>15."Pneumonia/etiology"[Mesh]<br>16."Pneumonia/prevention and control"[Mesh]<br>17."Nutritional Status"[Mesh] | 21."Stroke"[Mesh]<br>22.Stroke discharge/<br>23.Post-stroke/<br>24."Stroke Rehabilitation" [Mesh]<br>25."Brain Ischemia/ complications"[Mesh]<br>26."Cerebral Infarction"[Mesh]<br>27."Cerebral Hemorrhage"[Mesh] | 28."Economics"[Mesh]<br>29."Economics" [Subheading]<br>30."Models, Economic"[Mesh]<br>31.Cost effective*<br>32.Cost[WORD]<br>33.Costs[WORD]<br>34."Health Resources"[Mesh]<br>35."Tertiary Care Centers/economics"[Mesh]<br>36."Hospitalization/economics"[Mesh]<br>37."Rehabilitation Centers/economics"[Mesh]<br>38."Physical Therapy Modalities/economics"[Mesh]<br>39."Length of Stay/economics"[Mesh]<br>40."Medicare/economics" [Mesh]<br>41."Emergency Medical |

|                                  |  |                                                        |
|----------------------------------|--|--------------------------------------------------------|
| 18. "Nutrition Assessment"[Mesh] |  | Services/economics"                                    |
| 19. "Malnutrition"[Mesh]         |  | [Mesh]                                                 |
| 20. Enteral Nutrition*           |  | 42. "Food, Formulated/<br>economics"[Mesh]             |
|                                  |  | 43. "Cerebrovascular<br>Disorders/<br>economics"[Mesh] |

Terms, detailed in the three columns above, related to Oropharyngeal Dysphagia, Stroke and Health Economics will be connected using "AND".

1  
2  
3  
4 **Figure 1. Selection process flow diagram**  
5  
6  
7  
8  
9  
10  
11  
12  
13  
14  
15  
16  
17  
18  
19  
20  
21  
22  
23  
24  
25  
26  
27  
28  
29  
30  
31  
32  
33  
34  
35  
36  
37  
38  
39  
40  
41  
42  
43  
44  
45  
46  
47  
48  
49  
50  
51  
52  
53  
54  
55  
56  
57  
58  
59  
60

For peer review only

1  
2  
3  
4  
5  
6  
7  
8  
9  
10  
11  
12  
13  
14  
15  
16  
17  
18  
19  
20  
21  
22  
23  
24  
25  
26  
27  
28  
29  
30  
31  
32  
33  
34  
35  
36  
37  
38  
39  
40  
41  
42  
43  
44  
45  
46  
47  
48  
49  
50  
51  
52  
53  
54  
55  
56  
57  
58  
59  
60

Figure 1: Selection process, flow diagram

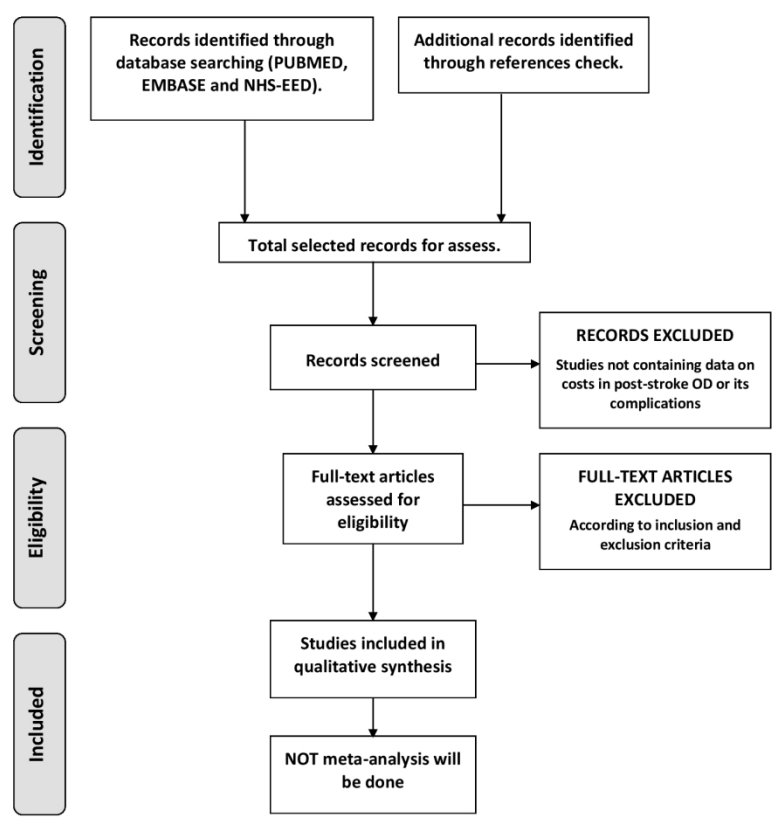

Figure 1. Selection process flow diagram

209x297mm (200 x 200 DPI)

# BMJ Open

## Cost of Oropharyngeal Dysphagia after Stroke: protocol for a systematic review.

|                                 |                                                                                                                                                                                                                                                                                                                 |
|---------------------------------|-----------------------------------------------------------------------------------------------------------------------------------------------------------------------------------------------------------------------------------------------------------------------------------------------------------------|
| Journal:                        | <i>BMJ Open</i>                                                                                                                                                                                                                                                                                                 |
| Manuscript ID                   | bmjopen-2018-022775.R2                                                                                                                                                                                                                                                                                          |
| Article Type:                   | Protocol                                                                                                                                                                                                                                                                                                        |
| Date Submitted by the Author:   | 18-Oct-2018                                                                                                                                                                                                                                                                                                     |
| Complete List of Authors:       | Marin, Sergio; Consorci Sanitari del Maresme, Pharmacy Department Serra-Prat, Mateu; Consorci Sanitari del Maresme, Unitat de Recerca Ortega, Omar; Consorci Sanitari del Maresme, Gastrointestinal Physiology Laboratory<br>Clave, Pere; Consorci Sanitari del Maresme, Gastrointestinal Physiology Laboratory |
| <b>Primary Subject Heading</b>: | Health economics                                                                                                                                                                                                                                                                                                |
| Secondary Subject Heading:      | Gastroenterology and hepatology, Neurology                                                                                                                                                                                                                                                                      |
| Keywords:                       | Oropharyngeal Dysphagia, Pneumonia, aspiration, Malnutrition, Stroke < NEUROLOGY, Economics < TROPICAL MEDICINE, Health Resources                                                                                                                                                                               |
|                                 |                                                                                                                                                                                                                                                                                                                 |

SCHOLARONE™  
Manuscripts

1  
2  
3  
4 TITLE5  
6  
7 Cost of Oropharyngeal Dysphagia after Stroke: protocol for a systematic review.  
89  
10 AUTHORS11  
12 1. Marin Rubio, Sergio (Corresponding Author). Consorci Sanitari del Maresme, Pharmacy,  
13 Mataro, Catalunya, ES.  
1415  
16 Postal address: Consorci Sanitari del Maresme, Carretera de Cirera, w/n. Mataro, Barcelona, ES  
17  
18 08304.  
1920  
21 Email: smarin@csdm.cat  
2223  
24 Tel. 93 741 77 00. Fax.93 741 77 53.  
25  
2627  
28 2. Serra Prat, Mateu. Consorci Sanitari del Maresme, Research Unit, Mataro, Catalunya, ES.  
29  
30 Centro de Investigación Biomédica en Red de enfermedades hepáticas y digestivas  
31  
32 (CIBERehd), Instituto de Salud Carlos III, Barcelona Catalunya, ES.  
33  
3435  
36 3. Ortega Fernandez, Omar. Consorci Sanitari del Maresme, Gastrointestinal Physiology  
37  
38 Laboratory, Universitat Autònoma de Barcelona, Mataro, Catalunya, ES. Centro de  
39  
40 Investigación Biomédica en Red de enfermedades hepáticas y digestivas (CIBERehd),  
41  
42 Instituto de Salud Carlos III, Barcelona Catalunya, ES.  
43  
4445  
46 4. Clavé Civit, Pere. Consorci Sanitari del Maresme, Gastrointestinal Physiology Laboratory,  
47  
48 Universitat Autònoma de Barcelona, Mataro, Catalunya, ES. Centro de Investigación  
49  
50 Biomédica en Red de enfermedades hepáticas y digestivas (CIBERehd), Instituto de  
51  
52 Salud Carlos III, Barcelona Catalunya, ES.  
53  
54  
55  
56  
57  
58  
59  
60

1  
2  
3  
4 WORD COUNT  
5

6  
7 4528  
8  
9

10 ABSTRACT  
11

12  
13 **Introduction:**  
14

15  
16 Oropharyngeal dysphagia (OD) is a major disorder following stroke. OD can produce alterations  
17  
18 in both the efficacy and safety of deglutition and may result in malnutrition, dehydration, frailty,  
19  
20 respiratory infections and pneumonia. These complications can be avoided by early detection  
21  
22 and treatment of OD in post-stroke patients and hospital stays, medication and mortality rates  
23  
24 can be reduced. In addition to acute in-hospital costs from OD complications, there are other  
25  
26 costs related to post-stroke OD such as direct non-healthcare costs or indirect costs. The  
27  
28 objective of this systematic review is to assess and summarize literature on the costs related to  
29  
30 OD in post-stroke patients.  
31  
32  
33  
34  
35

36 **Methods and analysis:**  
37

38  
39 A systematic review of studies on the cost of OD and its complications (aspiration, malnutrition,  
40  
41 dehydration, aspiration pneumonia and death) in stroke patients will be performed from the  
42  
43 perspectives of the hospital, the health care system and/or the society. The main outcomes of  
44  
45 interest are the costs related to post-stroke OD. We will search MEDLINE, EMBASE and the  
46  
47 National Health Service Economic Evaluation Database (NHS EED). Studies will be included if  
48  
49 they are partial economic evaluation studies, studies that provide information on costs in adult  
50  
51 (>17 years) post-stroke patients with OD and/or its complications (malnutrition, dehydration,  
52  
53  
54  
55  
56  
57  
58  
59  
60



1  
2  
3  
4 frailty, respiratory infections and pneumonia) or economic evaluation studies in which the cost  
5  
6 of this condition has been estimated. Studies will be excluded if they refer to oesophageal  
7  
8 dysphagia or OD caused by causes other than stroke. Main study information will be presented  
9  
10 and summarized in tables, separately for studies that provide incremental costs attributable to  
11  
12 OD or its complications and studies that report the effect of OD or its complications on total  
13  
14 costs of stroke, and according to the perspective from which costs were measured.  
15  
16  
17  
18

19 **Ethics and dissemination:**

20  
21  
22 The results of this systematic review will be published in a peer-reviewed journal.  
23  
24

25 **PROSPERO registration number: CRD42018099977.**

26  
27  
28 **KEYWORDS**

29  
30  
31 Oropharyngeal Dysphagia

32  
33  
34 Deglutition Disorders

35  
36  
37 Pneumonia, aspiration

38  
39  
40 Respiratory Aspiration

41  
42  
43 Malnutrition

44  
45  
46 Stroke

47  
48  
49 Stroke Rehabilitation

50  
51  
52 Cerebral Infarction

53  
54  
55 Cerebral Hemorrhage

1  
2  
3  
4 Economics

5  
6  
7 Health Resources

8  
9  
10 STRENGTHS AND LIMITATIONS OF THIS STUDY

- 11  
12  
13 1. This systematic review protocol was performed using the PRISMA recommendations.  
14  
15  
16 2. The proposed methodology will allow us to assess the quality of the selected studies.  
17  
18  
19 3. The bibliographic search considers Medline and Embase databases.  
20  
21  
22 4. Unpublished material and abstracts will not be included in this systematic review.  
23  
24  
25 5. Costs are very context-specific so they are difficult to summarize in a single result.  
26  
27  
28  
29  
30  
31  
32  
33  
34  
35  
36  
37  
38  
39  
40  
41  
42  
43  
44  
45  
46  
47  
48  
49  
50  
51  
52  
53  
54  
55  
56  
57  
58  
59  
60

## INTRODUCTION

Oropharyngeal Dysphagia (OD) is a major disorder following stroke with a high incidence in acute post-stroke patients (37-78%).<sup>[1]</sup> OD can improve after the first weeks of the stroke, however it persists in as many as 50% of patients.<sup>[2]</sup> OD, which is classified in the latest editions of the International Classification of Diseases (ICD-10) promoted by the World Health Organization <sup>[3]</sup>, can produce alterations in both the efficacy and the safety of deglutition. Impaired efficacy of swallow causes malnutrition and/or dehydration in up to 25% of patients and impaired safety of swallow may lead to aspiration pneumonia with high mortality rates.<sup>[1,4-5]</sup> However, still today, most patients do not receive comprehensive care and post-stroke OD is an underdiagnosed and undertreated condition worldwide. OD is an inexpensive complication to diagnose. For OD diagnosis, well-established methods and tools exist, such as routine screening followed by expert assessment. Position Statements of the European Society for Swallowing Disorders recommend that all stroke patients should be screened for OD with available, easy to use and validated screening tools.<sup>[6]</sup> Evidence-based and effective treatment for OD is mainly oriented to compensating swallow impairments through adaptation of fluid viscosity and solid food textures to avoid aspiration and choking, and improving nutritional

1  
2  
3  
4 status and oral health to avoid respiratory infections. Advances in treatment are mainly focused  
5  
6 on peripheral stimulation strategies and central, noninvasive stimulation strategies. Among  
7  
8 these methods, transcutaneous and intrapharyngeal electrical stimulation, pharmacological  
9  
10 stimulation through transient receptor potential channels of the vanilloid subtype (TRPV)  
11  
12 agonists and non invasive brain stimulation techniques (NIBS), repetitive transcranial magnetic  
13  
14 stimulation, and transcranial direct current stimulation are emerging treatments for swallow  
15  
16 dysfunction among post-stroke patients.[7] The aim of these interventions is to restore the  
17  
18 swallow function.  
19  
20  
21  
22  
23

24 Screening and treatment of malnutrition and dehydration are also two important challenges for  
25  
26 these patients in order to avoid complications related with malnutrition such as pressure  
27  
28 sores.[8] Moreover, screening and promotion of good oral health practices among these  
29  
30 patients should be implemented to reduce bacterial colonization by respiratory pathogens.[9-  
31  
32 10]  
33  
34  
35  
36

37 Regardless of its etiology, OD has been related to longer length of stay, and higher inpatient  
38  
39 costs, likelihood of being transferred to post-acute care facility and inpatient mortality during  
40  
41 hospitalization.[11] Early detection and treatment of OD in post-stroke patients can diminish  
42  
43 these complications and reduce hospital stays, readmissions, aspiration pneumonia and  
44  
45 mortality rates, as well as the use of some medication such as antibiotics.[12] Taking into  
46  
47 account all these secondary complications related to post stroke OD, this condition could have a  
48  
49 high economic impact on health care costs. The correct treatment of this condition could lead to  
50  
51 considerable savings in health care costs. In addition to acute in-hospital costs due to OD  
52  
53  
54  
55  
56  
57  
58  
59  
60

1  
2  
3  
4 complications, there are other costs related to post-stroke OD such as rehabilitation care,  
5  
6 institutionalization, direct non-healthcare costs, and indirect costs due to loss of productivity.  
7  
8 The chronic nature of OD means medical costs related to patient care outside the acute hospital  
9  
10 setting must be taken into account. Knowing costs related to this post-stroke disorder can lead  
11  
12 to a better understanding of its impact. Our hypothesis is that the impact of OD on the health-  
13  
14 economic and social costs of stroke is high and that minimal care of OD is economically sounder  
15  
16 than low care of OD. Therefore our aim is to quantify the cost of acute and chronic post-stroke  
17  
18 OD. It is important to understand the economic burden in order to change clinical practice.  
19  
20 However, costs associated to acute and chronic OD in stroke patients have been poorly studied  
21  
22 and are not well known. One study has shown that presenting OD after stroke was associated  
23  
24 with high mortality rates during hospital stay and was an independent risk factor for prolonged  
25  
26 length of hospital stay and to be institutionalized after hospital discharge; OD was also an  
27  
28 independent risk factor for poorer functional capacity and increased risk of mortality 3 months  
29  
30 after the stroke episode. This study stated these factors were of great importance not only from  
31  
32 the perspective of patient health, but also because of their social and economic burden.[13] The  
33  
34 objective of this systematic review is to assess and summarize all the knowledge on the costs  
35  
36 related to OD in post-stroke patients.  
37  
38  
39  
40  
41  
42  
43  
44

#### 45 46 METHODS AND ANALYSIS

47  
48 A systematic review of studies on the cost of OD and its complications (aspiration, malnutrition,  
49  
50 dehydration, aspiration pneumonia or death) in stroke patients will be performed from hospital,  
51  
52  
53  
54  
55  
56  
57  
58  
59  
60

1  
2  
3  
4 health care system and social perspectives. The main outcome of interest is the costs related to  
5  
6 post-stroke OD. This systematic review will be performed during 2018.  
7

### 8 9 **PRISMA statement**

10  
11 Systematic reviews are fundamental instruments to assess all the evidence related to a topic  
12  
13 precisely and trustworthily. Nowadays, systematic reviews are key tools in updating the  
14  
15 knowledge on a certain topic, achieving conclusions on available evidence, and taking decisions  
16  
17 in the health care environment. Because of this, systematic reviews must follow an exhaustive  
18  
19 and accurate methodology and need to be reported with clarity and transparency. For this  
20  
21 reason, we will use the methodology proposed by PRISMA (Preferred Reporting Items for  
22  
23 Systematic review and Meta-Analyses) to carry out this systematic review.[14] In this protocol,  
24  
25 PRISMA-P annex (Preferred Reporting Items for Systematic Reviews and Meta-Analysis  
26  
27 Protocols) has been used. PRISMA-P is a specific PRISMA section to develop protocols. It can be  
28  
29 used as a guideline to develop protocols for systematic reviews according to PRISMA  
30  
31 methodology. Moreover, PRISMA-P offers study examples for each item included in the  
32  
33 protocol. These examples are extracted from studies that have been relevant in their respective  
34  
35 fields, reported with high quality and carried out using accurate methodology.[15] We need to  
36  
37 use protocols to increase work quality and reduce to the maximum the risk of bias secondary to  
38  
39 mistaken internal methodology and inaccurate reporting. Protocols are key tools for developing  
40  
41 systematic reviews that can lead to reliable results to help in decision-making, improve backup  
42  
43 for future investigation and serve as a summary of the available evidence on a certain topic. For  
44  
45 all these reasons, we use PRISMA as a reference in this work.  
46  
47  
48  
49  
50  
51  
52  
53  
54  
55  
56  
57  
58  
59  
60

## Literature search

We will search MEDLINE using Pubmed and EMBASE using Ovid. We will search on the National Health Service Economic Evaluation Database (NHS EED) as well using the Center for Reviews and Dissemination Database of the University of York. The Mesh and search terms used in the search strategy and their combination are described in Table 1. Using this search strategy in MEDLINE using Pubmed, a total of seventy articles were found in June 2018. No publication date and no language restrictions will be imposed. Unpublished material and abstracts will not be included in this systematic review.

## Selection process

We will analyse all the studies identified through the literature search described in this protocol using a double-phase process: an initial screening phase and a subsequent selection phase where studies will be included according to the review eligibility criteria. The references of the studies included will be checked for additional eligible studies.

In the initial screening phase, the abstract and title of the studies will be analyzed to eliminate studies not containing data on costs in post-stroke OD, its complications (malnutrition, dehydration, frailty, respiratory infections and pneumonia) or relevant data or information. In the abstract or title there must appear an economic term such as “costs” or “resources consumption” and “dysphagia” or “malnutrition, dehydration, frailty, respiratory infections and pneumonia” with “stroke”. This selection process will be done by one sole reviewer and, subsequently, a second reviewer will check the eliminated abstracts.

1  
2  
3  
4 In the second selection phase, studies will be included in the systematic review if they have  
5  
6 partial economic evaluation, studies that provide information about costs in adult (>17years)  
7  
8 post-stroke patients with OD and/or its complications (malnutrition, dehydration, frailty,  
9  
10 respiratory infections and pneumonia) or economic evaluation studies in which the cost of OD  
11  
12 has been estimated. Studies will be excluded if they are (a) oesophageal dysphagia studies, (b)  
13  
14 studies not related to OD, (c) studies in which OD is related to a cause other than stroke, (d)  
15  
16 duplicate publications of the same study or, (e) other causes (explained above). This information  
17  
18 will be presented in a content table. Full text of selected studies will be carefully assessed  
19  
20 according to a pre-established data collection notebook. Figure 1 summarizes the selection  
21  
22 process. Two independent reviewers will participate in this selection process. In case of  
23  
24 disagreement over one or more studies, a third reviewer will review the study and a final  
25  
26 consensus will be made. The reason for excluding the study will be recorded. No restrictions  
27  
28 related to the size of the sample will be imposed.  
29  
30  
31  
32  
33  
34  
35

### 36 **Data collection**

37  
38  
39 Two reviewers will extract data from the selected studies and will register it in a standard data  
40  
41 collection form. In case of disagreement between them, a third reviewer opinion will be  
42  
43 required to reach an agreement and to take a final consensus decision. If necessary, we will  
44  
45 contact authors of included studies in order to ask for unreported information or to clarify  
46  
47 possible misunderstandings. Data directly obtained from the authors will be clearly identified.  
48  
49 We will report any assumption resulting from lost or unavailable information. To manage study  
50  
51 data, we will transfer all information in the data collection form to a spreadsheet. Data  
52  
53  
54  
55  
56  
57  
58  
59  
60



1  
2  
3  
4 gathering will refer to main study characteristics, quality assessment and study results. The  
5  
6 information to be obtained from each study is presented below:  
7  
8

9  
10 a. Study identification: First author, journal of publication, and year of publication.  
11

12  
13 b. Main design characteristics: type of study (cost of illness study or another type of study that  
14 provides cost of illness information in this field); epidemiological approach (cross-sectional or  
15 longitudinal); retrospective or prospective data gathering; perspective of the analysis (hospital,  
16 patient, health care system, societal or insurance carrier perspective); time horizon; use of  
17 temporary discount rate; sensitivity analysis (yes/no); presence of a control group (patients not  
18 affected by OD); location/setting.  
19  
20  
21  
22  
23  
24  
25  
26

27  
28 c. Study sample characteristics: sample size; socio-demographic data (age, average and range;  
29 gender); patient inclusion and exclusion criteria; patient's functional capacity (RANKIN, Barthel);  
30 patient's comorbidities (Charlson); stroke type (ischemic or haemorrhagic); NIHSS scale and/or  
31 Canadian Neurologic Scale on admission and on discharge; fibrinolysis treatment (yes/no);  
32 endovascular treatment (yes/no); method used to diagnose OD (videofluoroscopy (VFS),  
33 fiberoptic endoscopic evaluation of swallowing (FEES), volume-viscosity swallowing test (V-VST),  
34 or other bedside methods); nutritional assessment; discharge destination (rehabilitation ward,  
35 nursing home, domicile).  
36  
37  
38  
39  
40  
41  
42  
43  
44  
45  
46

47  
48 d. Elements of cost considered: Direct healthcare costs (hospital ward, intensive care unit,  
49 emergency room, institutionalization in a nursing home, primary care visits and to nutritionists,  
50 physical therapists, speech therapists, ambulance, medication, diagnostic tests, special diets,  
51 tube-feeding, PEG-insertion, antibiotic consumption, pneumonia-related costs, etc.), direct non-  
52  
53  
54  
55  
56  
57  
58  
59  
60

1  
2  
3  
4 health care costs (social services and transportation costs), and indirect costs (loss of  
5  
6 productivity).

7  
8  
9 e. Data source: medical registries, MEDICARE databases, national patient databases, insurance  
10  
11 databases, data collected from individual research groups, data collected from individual  
12  
13 hospitals.

14  
15  
16 f. Study results: The primary outcome will be the costs related to OD in post-stroke patients  
17  
18 reported in monetary units (euros). If the studies provide specific breakdown of costs, we will  
19  
20 report this information (direct hospital costs, rehabilitation care costs, direct non-healthcare  
21  
22 costs, indirect costs and productivity loss, and intangible costs). We will also collect data on  
23  
24 quantities of health and social resource consumption, currencies used and whether the study  
25  
26 shows total or incremental costs. Whenever possible, the cost adjusted for the severity of the  
27  
28 stroke (-e.g. based on NIHSS or Canadian scale) or other confounding factors will be considered.  
29  
30  
31

32  
33  
34 **Quality assessment, risk of bias in individual studies, meta bias and confidence in cumulative**  
35  
36 **evidence**

37  
38 Methodological quality and risk of bias and meta bias will be evaluated using Drummond's  
39  
40 checklist for assessing economic evaluations.[16] This checklist provides a set of items  
41  
42 applicable to a critical appraisal of health economic evaluation studies and includes the  
43  
44 following three domains: study design, data collection and analysis and interpretation of results.  
45  
46 Each checklist domain has different sections; there are 10 sections containing questions on the  
47  
48 study and every section will be rated as "Yes/partly/no". A fourth option as "not available/not  
49  
50 applicable" has been added since not all sections are adapted to studies like cost of illness  
51  
52  
53  
54  
55  
56  
57  
58  
59  
60

1  
2  
3  
4 studies. Drummond's original list consists of 35 points but we have adapted it and will only use  
5  
6 the 25 points applicable to cost studies. We will give a global score for the quality of each study  
7  
8 which we calculate dividing the total number of points rated as "yes" between the total points  
9  
10 applicable for each study, and record it as a percentage.  
11  
12

13  
14 We will assess confidence and strength of evidence in this systematic review using GRADE  
15  
16 (Grading of Recommendations Assessment, Development and Evaluation) methodology.[17]  
17  
18 GRADE is a tool designed to assess the strength of the summarized evidence across studies in  
19  
20 systematic reviews by evaluating both study limitations, imprecision, inconsistency of results,  
21  
22 indirectness of evidence, publication bias, magnitude of the effect and the presence of  
23  
24 confounders that minimize the effect. Finally, we will rate the strength of evidence across  
25  
26 studies as high, moderate, low or very low and we will make an evidence profile with a detailed  
27  
28 quality assessment.  
29  
30  
31  
32  
33  
34  
35

### 36 **Data synthesis**

37  
38 A systematic meta-narrative synthesis will be made, so, we will present the results in narrative  
39  
40 form. Findings and characteristics of the included studies will be summarized and explained in  
41  
42 text and tables. We will present results in the text following this order: (i) data on costs related  
43  
44 to post-stroke OD, (ii) data on costs related to OD complications in this order: (a) aspiration, (b)  
45  
46 malnutrition, (c) dehydration, (d) aspiration pneumonia and (e) death. Data will be presented  
47  
48 separately for those studies that provide incremental costs attributable to OD or its  
49  
50 complications from those studies that report the effect of OD or its complications on total costs  
51  
52  
53  
54  
55  
56  
57  
58  
59  
60

1  
2  
3  
4 of stroke, and according to the perspective in which costs are measured (hospital, patient,  
5  
6 healthcare system, societal, or insurance carrier). Main study information will be presented and  
7  
8 summarized in several tables of evidence. This presentation will be performed separately in the  
9  
10 same way as in tables. No conversion of study data will be performed and all data will be  
11  
12 reported in the original format during the initial presentation of the results. One set of tables of  
13  
14 evidence will present main designs and sample characteristics as well as cost elements  
15  
16 considered and data source. Another set of tables will report data on main results and quality  
17  
18 assessment.  
19  
20  
21  
22

23  
24 A weighted mean cost of post-stroke OD will be estimated for those studies with the same  
25  
26 perspective and time horizon and with similar design characteristics. Mean cost will be weighted  
27  
28 by sample size. No other quantitative methods of synthesizing data will be performed.  
29  
30 Moreover, evidence obtained from studies will be synthesized through a qualitative synthesis  
31  
32 method, using a meta-narrative method. In this section, we will take into account the risk of bias  
33  
34 information obtained from each study. No study will be eliminated based on its risk of bias, but  
35  
36 we will assess how risk of bias can affect the main results and outcome measures. To present  
37  
38 this data synthesis of results correctly, we will follow the recommendations stated in the  
39  
40 guidance from the Centre for Reviews and Dissemination.[18]  
41  
42  
43  
44  
45

#### 46 **Glossary of terms in health economics:**

47  
48  
49 -Economic evaluation in healthcare: analytical methodology that aims to compare the costs and  
50  
51 the consequences in health of various alternatives (interventions, treatments, programmes,  
52  
53 etc.).  
54  
55  
56  
57  
58  
59  
60

1  
2  
3  
4 -Partial economic evaluation: economic evaluation technique that only compares the costs of  
5  
6 the various alternatives studied but does not consider their effects on health. Also called cost  
7  
8 analysis.  
9

10  
11 - Analysis perspective: point of view from which the analysis is focused and which determines  
12  
13 the cost elements to consider. Each perspective provides specific information for a particular  
14  
15 entity, e.g. hospital perspective mainly includes acute in-hospital costs while healthcare system  
16  
17 perspective includes costs related to those medical costs beyond the acute in-hospital stay. The  
18  
19 societal perspective is the most complete because it includes healthcare and non-healthcare  
20  
21 costs and loss of productivity.  
22  
23  
24

25  
26 - Type of costs: cost studies classify costs as direct costs, indirect costs and intangible costs.  
27

- 28  
29  
30 • Direct medical costs are those related to a healthcare intervention (e.g. hospital ward or  
31  
32 medication) and direct non-medical costs are those associated with provision of medical  
33  
34 services (e.g. transportation costs).  
35  
36
- 37 • Indirect costs are those related to productivity loss, morbidity, mortality or time spent.  
38  
39
- 40 • Intangible costs are rarely studied and are those related to suffering and pain related to  
41  
42 a disease or treatment.  
43  
44

45 -Discount rate: There is a preference to obtain benefits straight away and to delay costs. When  
46  
47 the time horizon is longer than one year, a temporary discount rate should be used to allow  
48  
49 costs and results that will occur over time to be measured at present values. An annual 3-5%  
50  
51 discount rate is usually used.  
52  
53  
54  
55  
56  
57  
58  
59  
60

1  
2  
3  
4 -Sensitivity analysis: Some decisions in the economic analysis are based on uncertain data. The  
5  
6 sensitivity analysis is aimed at testing the robustness of results of the economic evaluation when  
7  
8 changing the assumed values of some variables used in the analysis. [14, 19]  
9  
10

#### 11 12 13 14 PATIENT AND PUBLIC INVOLVEMENT STATEMENT:

15  
16 There was no public or patient involvement in the elaboration of this protocol.  
17  
18

#### 19 20 21 ETHICS AND DISSEMINATION

22  
23  
24 The results of this systematic review will be published in a peer-reviewed journal. This  
25  
26 systematic review is the first part of a research project aiming to evaluate the health economic  
27  
28 and social costs of OD in stroke patients to better understand and raise awareness on minimal  
29  
30 care for this common and severe complication. Complications of OD are related to three main  
31  
32 aspects: a) impaired safety of swallow, causing the aspiration of respiratory pathogens to the  
33  
34 airway; b) impaired nutritional status, leading to malnutrition, impaired immunity and frailty;  
35  
36 and c) poor oral health and hygiene, associated with oral colonization by respiratory pathogens.  
37  
38 It is necessary to treat these three aspects simultaneously with the aim of maximizing the  
39  
40 number of patients treated with simple and cost-effective measures based on the best scientific  
41  
42 evidence. This minimal and massive intervention is based on fluid and food texture adaptations,  
43  
44 nutritional supplementation and oral hygiene.[20] The full extent of this project will include a) a  
45  
46 systematic review of the literature on the cost of OD after stroke; b) a systematic review of the  
47  
48 literature on full economic evaluations of interventions related to OD; c) a health economic  
49  
50  
51  
52  
53  
54  
55  
56  
57  
58  
59  
60

1  
2  
3  
4 analysis of a study on the prevalence and evolution of OD in patients with stroke (with one year  
5 follow-up) to assess the cost of OD; and d) a study on the cost-effectiveness of compensatory  
6 vs. active interventions (those treatments for OD that aim to restore the impaired swallow  
7 function) to improve swallowing function in these patients. OD treatment is moving from  
8 compensatory strategies towards promoting brain plasticity, both to recover swallow function  
9 and to improve brain-related swallowing dysfunction.[7]  
10  
11  
12  
13  
14  
15  
16  
17  
18  
19  
20  
21

## 22 AUTHORS' CONTRIBUTION

23  
24  
25 Marin Rubio, Sergio is the guarantor. He drafted the first version of this manuscript. He  
26 provided expertise on health economics. He contributed to the development of the introduction  
27 (rationales and objectives), the eligibility criteria, the selection of the information sources, the  
28 search strategy, the selection process, the quality assessment, the data extraction criteria and  
29 the data synthesis. He read and approval the final revision of this protocol.  
30  
31  
32  
33  
34  
35  
36  
37

38 Serra Prat, Mateu provided expertise on investigation methodology and health economics. He  
39 provided important references for the development of the methodology of this work. He  
40 reviewed and made contributions on the methodology of all the sections of this protocol. He  
41 reviewed the correct use of all the economic terms included in this manuscript. He collaborated  
42 in writing the manuscript.  
43  
44  
45  
46  
47  
48  
49

50  
51 Ortega Fernandez, Omar provided expertise on post-stroke OD treatments and interventions.  
52 He contributed on the development of the data collection, quality assessment and data  
53  
54  
55  
56  
57  
58  
59  
60

1  
2  
3  
4 synthesis sections. He provided a critical revision of all the sections of this protocol. He  
5  
6 collaborated in writing the manuscript. He collaborated in writing the manuscript.  
7  
8

9  
10 Clavé Civit, Pere provided expertise on post-stroke OD. He reviewed the correct use of all the  
11  
12 medical terms included in this manuscript. He contributed on the development and writing of  
13  
14 the introduction. He provided a critical revision of all the sections of this protocol. He  
15  
16 contributed to the correct following of the recommendations proposed by PRISMA.  
17  
18

19  
20 All authors provided a critical revision and read and approval the final revision of this protocol.  
21  
22

## 23 ACKNOWLEDGMENTS

24  
25 We would like to thank Agustí Viladot, member of Mataró Hospital library service, for helping  
26  
27 with search strategy and Jane Lewis for reviewing the English. This work has been conducted  
28  
29 within the framework of a doctoral thesis in medicine from the Medicine Department of the  
30  
31 Autonomous University of Barcelona.  
32  
33

## 34 35 36 FUNDING STATEMENT

37  
38 This study is funded by an educational grant from Nutricia Advanced Medical Nutrition. This  
39  
40 study is supported by Fundació Salut del Consorci Sanitari del Maresme, Ciberehd (in turn  
41  
42 supported by the Instituto de Salud Carlos III, Barcelona, Spain) and Fundació de Recerca en  
43  
44 Gastroenterologia (FUREGA). The sponsor has no role in the development of this study.  
45  
46  
47  
48  
49

## 50 51 COMPETING INTERESTS STATEMENT

52  
53 The authors affirm that there are no conflicts of interest.  
54  
55  
56  
57  
58  
59  
60



## FULL REFERENCES

1 Martino R, Foley N, Bhogal S, et al. Dysphagia After Stroke: Incidence, Diagnosis, and Pulmonary Complications. *Stroke* 2005;36:2756-2763.

2 Mann G, Hankey GJ, Cameron D. Swallowing function after stroke: prognosis and prognostic factors at 6 months. *Stroke* 1999;30(4):744-8.

3 WHO, International classification of disease [online], URL:[<http://www.who.int/classifications/icd/en>] [Date accessed: February 2018].

4 Clavé P, de Kraa M, Arreola V, et al. The effect of bolus viscosity on swallowing function in neurogenic dysphagia. *Aliment Pharmacol Ther* 2006;24(9):1385-94.

5 Cook IJ, Kahrilas PJ. AGA technical review on management of oropharyngeal dysphagia. *Gastroenterology* 1999;116(2):455-78.

6 Schepp SK, Tirschwell DL, Miller RM, et al. Swallowing screens after acute stroke: a systematic review. *Stroke* 2012;43(3):869-71.

7 Cabib C, Ortega O, Kumru H, et al. Neurorehabilitation strategies for poststroke oropharyngeal dysphagia: from compensation to the recovery of swallowing function. *Ann N Y Acad Sci* 2016;1380(1):121-138.

8 Geeganage C, Beavan J, Ellender S, Bath PM. Interventions for dysphagia and nutritional

1  
2  
3  
4 support in acute and subacute stroke. *Cochrane Database Syst Rev* 2012;10:CD000323.

5  
6  
7 9 van der Maarel-Wierink CD, Vanobbergen JN, Bronkhorst EM, et al. Oral health care and  
8  
9 aspiration pneumonia in frail older people: a systematic literature review. *Gerodontology*  
10  
11 2013;30(1):3-9.

12  
13  
14 10 Seedat J, Penn C. Implementing oral care to reduce aspiration pneumonia amongst patients  
15  
16 with dysphagia in a South African setting. *S Afr J Commun Disord* 2016;63(1).

17  
18  
19 11 Patel DA, Krishnaswami S, Steger E, et al. Economic and survival burden of dysphagia among  
20  
21 inpatients in the United States. *Dis Esophagus* 2018;31(1):1-7.

22  
23  
24 12 Ickenstein GW, Riecker A, Höhlig C, et al. Pneumonia and in-hospital mortality in the context  
25  
26 of neurogenic oropharyngeal dysphagia (NOD) in stroke and a new NOD step-wise concept. *J*  
27  
28 *Neurol* 2010;257(9):1492-9.

29  
30  
31 13 Rofes L, Muriana D, Palomeras E, et al. Prevalence, risk factors and complications of  
32  
33 oropharyngeal dysphagia in stroke patients: A cohort study. *Neurogastroenterol Motil.*  
34  
35 2018;23:e13338.

36  
37  
38 14 Liberati A, Altman DG, Tetzlaff J, et al. The PRISMA Statement for Reporting Systematic  
39  
40 Reviews and Meta-Analyses of Studies That Evaluate Health Care Interventions: Explanation and  
41  
42 Elaboration. *BMJ* 2009;339:b2700.

43  
44  
45 15 Shamseer L, Moher D, Clarke M, et al. Preferred reporting items for systematic review and  
46  
47 meta-analysis protocols (PRISMA-P) 2015: elaboration and explanation. *BMJ* 2015;350:g7647.

48  
49  
50 16 Drummond MF, O'Brien B, Torrance GW, et al. *Methods for the economic evaluation of*  
51  
52 *health care programmes*. 2nd ed. Oxford. Oxford University Press 1997.

1  
2  
3  
4 17 Guyatt G, Oxman AD, Akl EA, et al. GRADE guidelines: 1. Introduction-GRADE evidence  
5 profiles and summary of findings tables. J Clin Epidemiol 2011;64(4):383-94.  
6  
7

8  
9  
10 18 Centre for Reviews and Dissemination. Systematic Reviews: CRD's Guidance for Undertaking  
11 Reviews in Health Care. York: Centre for Reviews and Dissemination, University of York 2009.  
12  
13

14  
15  
16 19 Jo C. Cost-of-illness studies: concepts, scopes, and methods. Clin Mol Hepatol  
17 2014;20(4):327-37.  
18  
19

20  
21 20 Martín A, Ortega O, Roca M, Arús M, Clavé P. Effect of A Minimal-Massive Intervention in  
22 Hospitalized Older Patients with Oropharyngeal Dysphagia: A Proof of Concept Study. J Nutr  
23 Health Aging 2018;22(6):739-747.  
24  
25  
26  
27  
28  
29  
30  
31  
32  
33  
34  
35  
36  
37  
38  
39  
40  
41  
42  
43  
44  
45  
46  
47  
48  
49  
50  
51  
52  
53  
54  
55  
56  
57  
58  
59  
60

**Table 1: Search terms and MeSH terms used in the bibliographic search**

| Terms related to Oropharyngeal Dysphagia and connected among themselves by "OR"                                                                                                                                                                                                                                                                                                                                                                                                                                                               | Terms related to Stroke and connected among themselves by "OR"                                                                                                                                                    | Terms related to Health Economics and connected among themselves by "OR"                                                                                                                                                                                                                                                                                                                                                              |
|-----------------------------------------------------------------------------------------------------------------------------------------------------------------------------------------------------------------------------------------------------------------------------------------------------------------------------------------------------------------------------------------------------------------------------------------------------------------------------------------------------------------------------------------------|-------------------------------------------------------------------------------------------------------------------------------------------------------------------------------------------------------------------|---------------------------------------------------------------------------------------------------------------------------------------------------------------------------------------------------------------------------------------------------------------------------------------------------------------------------------------------------------------------------------------------------------------------------------------|
| 1.Oropharyngeal Dysphagia.tw.<br>2.Dysphag*<br>3.Dysphagia therapy/<br>4."Deglutition"[Mesh]<br>5.Deglutition Disorders"[Mesh]<br>6."Oropharynx/abnormalities"[Mesh]<br>7."Oropharynx/diagnosis"[Mesh]<br>8."Oropharynx/diagnostic imaging"[Mesh]<br>9."Oropharynx/pathology"[Mesh]<br>10."Oropharynx/pharmacology"[Mesh]<br>11."Oropharynx/physiopathology"[Mesh]<br>12."Oropharynx/therapy"[Mesh]<br>13."Pneumonia, aspiration"[Mesh]<br>14."Respiratory Aspiration"[Mesh]<br>15."Pneumonia/etiology"[Mesh]<br>16."Pneumonia/prevention and | 21."Stroke"[Mesh]<br>22.Stroke discharge/<br>23.Post-stroke/<br>24."Stroke Rehabilitation" [Mesh]<br>25."Brain Ischemia/ complications"[Mesh]<br>26."Cerebral Infarction"[Mesh]<br>27."Cerebral Hemorrhage"[Mesh] | 28."Economics"[Mesh]<br>29."Economics" [Subheading]<br>30."Models, Economic"[Mesh]<br>31.Cost effective*<br>32.Cost[WORD]<br>33.Costs[WORD]<br>34."Health Resources"[Mesh]<br>35."Tertiary Care Centers/economics"[Mesh]<br>36."Hospitalization/economics"[Mesh]<br>37."Rehabilitation Centers/economics"[Mesh]<br>38."Physical Therapy Modalities/economics"[Mesh]<br>39."Length of Stay/economics"[Mesh]<br>40."Medicare/economics" |

1  
2  
3  
4  
5  
6  
7  
8  
9  
10  
11  
12  
13  
14  
15  
16  
17  
18  
19  
20  
21  
22  
23  
24  
25  
26  
27  
28  
29  
30  
31  
32  
33  
34  
35  
36  
37  
38  
39  
40  
41  
42  
43  
44  
45  
46  
47  
48  
49  
50  
51  
52  
53  
54  
55  
56  
57  
58  
59  
60

|                                 |  |                                                |
|---------------------------------|--|------------------------------------------------|
| control"[Mesh]                  |  | [Mesh]                                         |
| 17."Nutritional Status"[Mesh]   |  | 41."Emergency Medical Services/economics"      |
| 18."Nutrition Assessment"[Mesh] |  | [Mesh]                                         |
| 19."Malnutrition"[Mesh]         |  | 42."Food, Formulated/economics"[Mesh]          |
| 20.Enteral Nutrition*           |  | 43."Cerebrovascular Disorders/economics"[Mesh] |

Terms, detailed in the three columns above, related to Oropharyngeal Dysphagia, Stroke and Health Economics will be connected using "AND".

1  
2  
3  
4  
5  
6  
7  
8  
9  
10  
11  
12  
13 **Figure 1. Selection process flow diagram**  
14  
15  
16  
17  
18  
19  
20  
21  
22  
23  
24  
25  
26  
27  
28  
29  
30  
31  
32  
33  
34  
35  
36  
37  
38  
39  
40  
41  
42  
43  
44  
45  
46  
47  
48  
49  
50  
51  
52  
53  
54  
55  
56  
57  
58  
59  
60

1  
2  
3  
4  
5  
6  
7  
8  
9  
10  
11  
12  
13  
14  
15  
16  
17  
18  
19  
20  
21  
22  
23  
24  
25  
26  
27  
28  
29  
30  
31  
32  
33  
34  
35  
36  
37  
38  
39  
40  
41  
42  
43  
44  
45  
46  
47  
48  
49  
50  
51  
52  
53  
54  
55  
56  
57  
58  
59  
60

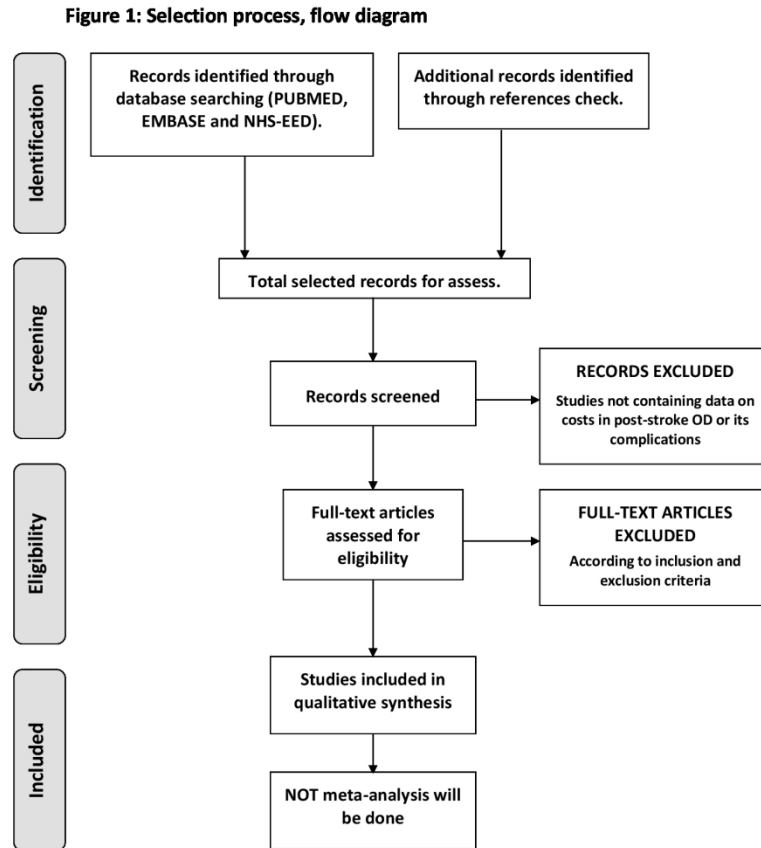

Figure 1. Selection process flow diagram

209x297mm (200 x 200 DPI)
